# Supplementary material for: Antimicrobial Triterpenoids and Ingol Diterpenes from Propolis of Semi-Arid Region of Morocco
Source: MDPI journal article supplement (doi:10.3390/molecules27072206), 2022-03-28

## Supplementary material

### Antimicrobial triterpenoids and ingol diterpenes from propolis of semi-arid region of Morocco

Ralitsa Chimshirova<sup>1</sup>, Milena Popova<sup>1\*</sup>, Amina Chakir<sup>2</sup>, Violeta Valcheva<sup>3</sup>, Simeon Dimitrov<sup>3</sup>, Boryana Trusheva<sup>1</sup>, Abderrahmane Romane<sup>2</sup>, Vassya Bankova<sup>1</sup>

<sup>1</sup>Institute of Organic Chemistry with Centre of Phytochemistry, Bulgarian Academy of Sciences, Acad. G. Bonchev str., bl. 9, 1113, Sofia, Bulgaria.

<sup>2</sup>Laboratory of Applied Chemistry, Faculty of Sciences Semlalia, Cadi Ayyad University, Boulevard Prince My Abdellah B.P. 2390, 40000, Marrakech, Morocco.

<sup>3</sup>The Stephan Angeloff Institute of Microbiology, Department of Infectious microbiology, Bulgarian Academy of Sciences, Acad. G. Bonchev st., bl. 26, Sofia, Bulgaria.

\*Correspondence: [Milena.Popova@orgchm.bas.bg](mailto:Milena.Popova@orgchm.bas.bg)

## Content

|                                                                                                                                                                    |    |
|--------------------------------------------------------------------------------------------------------------------------------------------------------------------|----|
| <b>Figure S1.</b> HRESIMS spectrum of <b>1</b> .....                                                                                                               | 3  |
| <b>Figure S2.</b> $^1\text{H}$ NMR, $^{13}\text{C}$ NMR, $^1\text{H}$ - $^1\text{H}$ COSY, HSQC, HMBC and NOESY spectra of <b>1</b> in $\text{CDCl}_3$ .....       | 4  |
| <b>Figure S3.</b> $^1\text{H}$ NMR, $^{13}\text{C}$ NMR, $^1\text{H}$ - $^1\text{H}$ COSY, HSQC, HMBC and NOESY spectra of <b>2</b> in $\text{CDCl}_3$ .....       | 7  |
| <b>Figure S4.</b> HRESIMS spectrum of <b>3</b> .....                                                                                                               | 10 |
| <b>Figure S5.</b> $^1\text{H}$ NMR, $^1\text{H}$ - $^1\text{H}$ COSY, HSQC, HMBC and ROESY spectra of <b>3</b> in $\text{CDCl}_3$ .....                            | 11 |
| <b>Figure S6.</b> $^1\text{H}$ NMR, $^{13}\text{C}$ NMR, DEPT, $^1\text{H}$ - $^1\text{H}$ COSY, HSQC, HMBC and ROESY spectra of <b>4</b> in $\text{CDCl}_3$ ..... | 14 |
| <b>Figure S7.</b> $^1\text{H}$ NMR, $^{13}\text{C}$ NMR, HSQC and HMBC spectra of <b>4</b> in acetone- $d_6$ .....                                                 | 18 |
| <b>Figure S8.</b> $^1\text{H}$ NMR, $^{13}\text{C}$ NMR, HSQC, HMBC and ROESY spectra of <b>5</b> in $\text{CDCl}_3$ .....                                         | 20 |
| <b>Figure S9.</b> $^1\text{H}$ NMR, $^{13}\text{C}$ NMR, HSQC, HMBC and ROESY spectra of <b>5</b> in acetone- $d_6$ .....                                          | 23 |
| <b>Figure S10.</b> $^1\text{H}$ NMR spectrum of <b>6</b> in $\text{CDCl}_3$ .....                                                                                  | 26 |
| <b>Figure S11.</b> $^1\text{H}$ NMR spectrum of <b>7</b> in $\text{CDCl}_3$ .....                                                                                  | 26 |
| <b>Figure S12.</b> $^1\text{H}$ NMR spectrum of <b>8</b> in $\text{CDCl}_3$ .....                                                                                  | 27 |
| <b>Figure S13.</b> $^1\text{H}$ NMR spectrum of <b>9</b> in $\text{CDCl}_3$ .....                                                                                  | 27 |
| <b>Figure S14.</b> $^1\text{H}$ NMR spectrum of <b>10</b> in $\text{CDCl}_3$ .....                                                                                 | 28 |
| <b>Figure S15.</b> $^1\text{H}$ NMR spectrum of a mixture of <b>11</b> and <b>12</b> (1:0.7) in $\text{CDCl}_3$ .....                                              | 28 |
| <b>Figure S16.</b> $^1\text{H}$ NMR spectrum of a mixture of <b>13</b> and <b>14</b> (1:0.8) in $\text{CDCl}_3$ .....                                              | 29 |
| <b>Figure S17.</b> $^1\text{H}$ NMR spectrum of <b>15</b> in $\text{CDCl}_3$ : $\text{CD}_3\text{OD}$ (1:1).....                                                   | 29 |

**Figure S1.** HRESIMS spectrum of **1**.

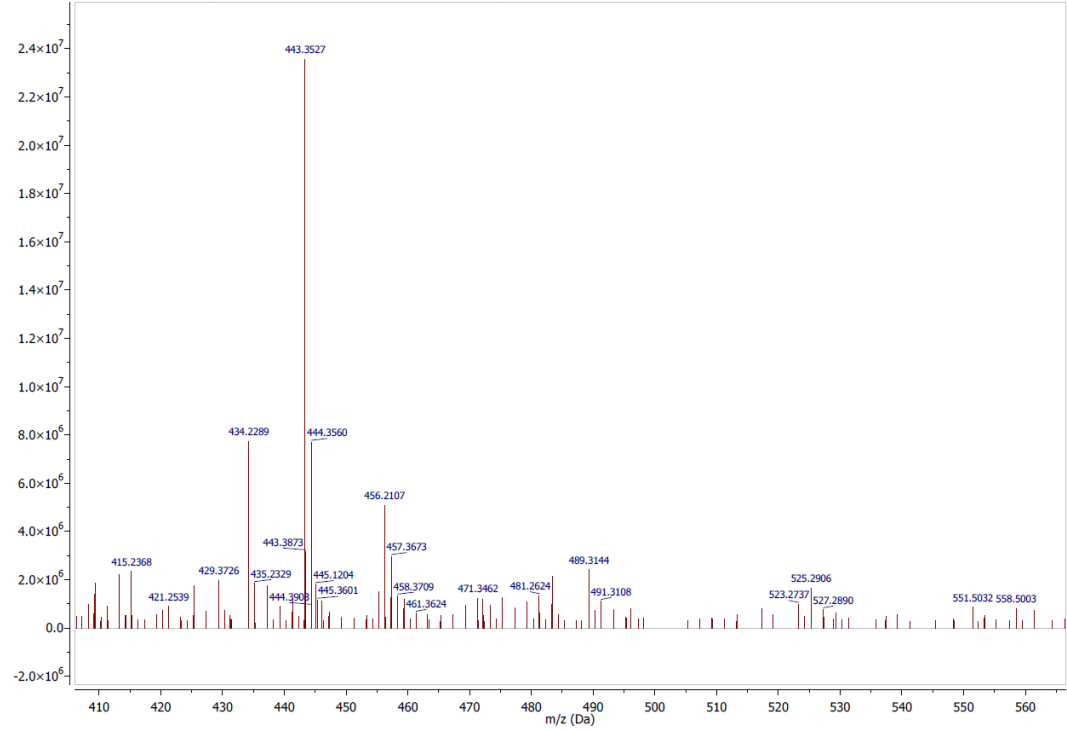

**Figure S2.**  $^1\text{H}$  NMR,  $^{13}\text{C}$  NMR,  $^1\text{H}$  -  $^1\text{H}$  COSY, HSQC, HMBC and NOESY spectra of **1** in  $\text{CDCl}_3$ .

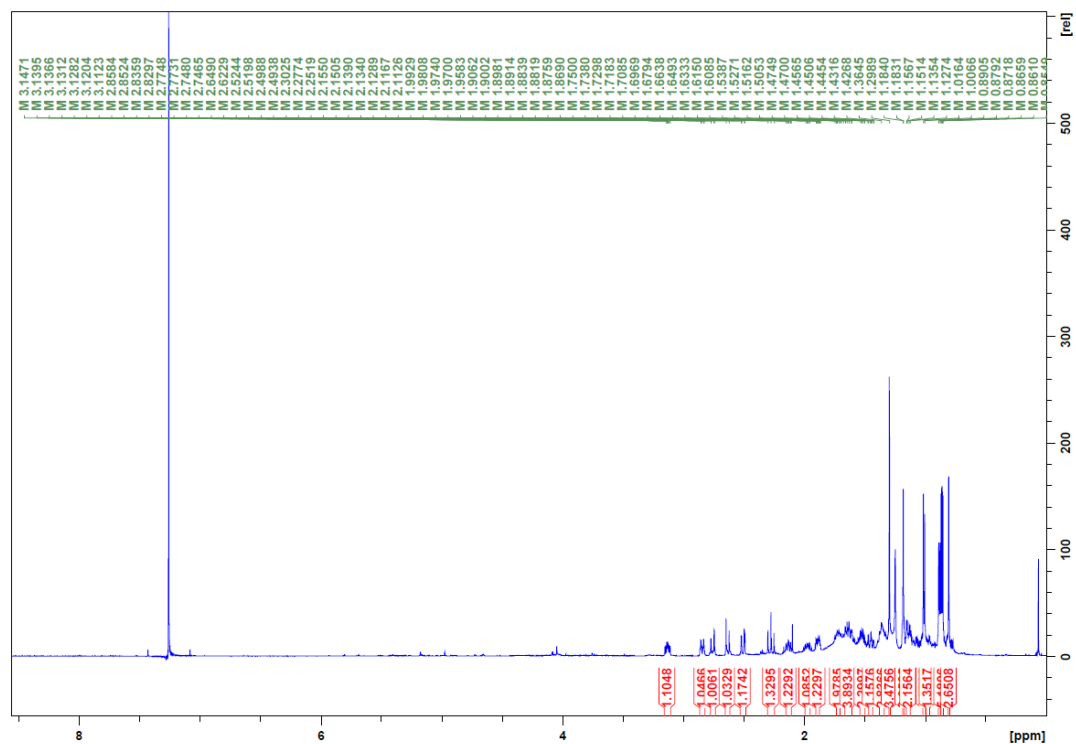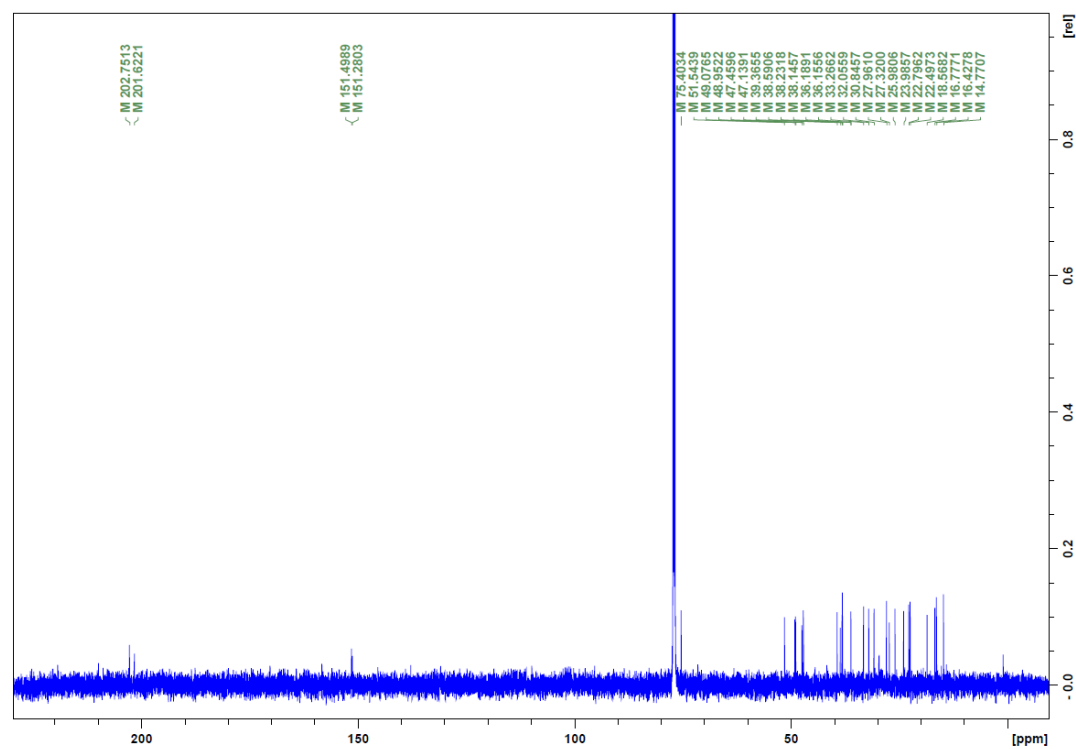

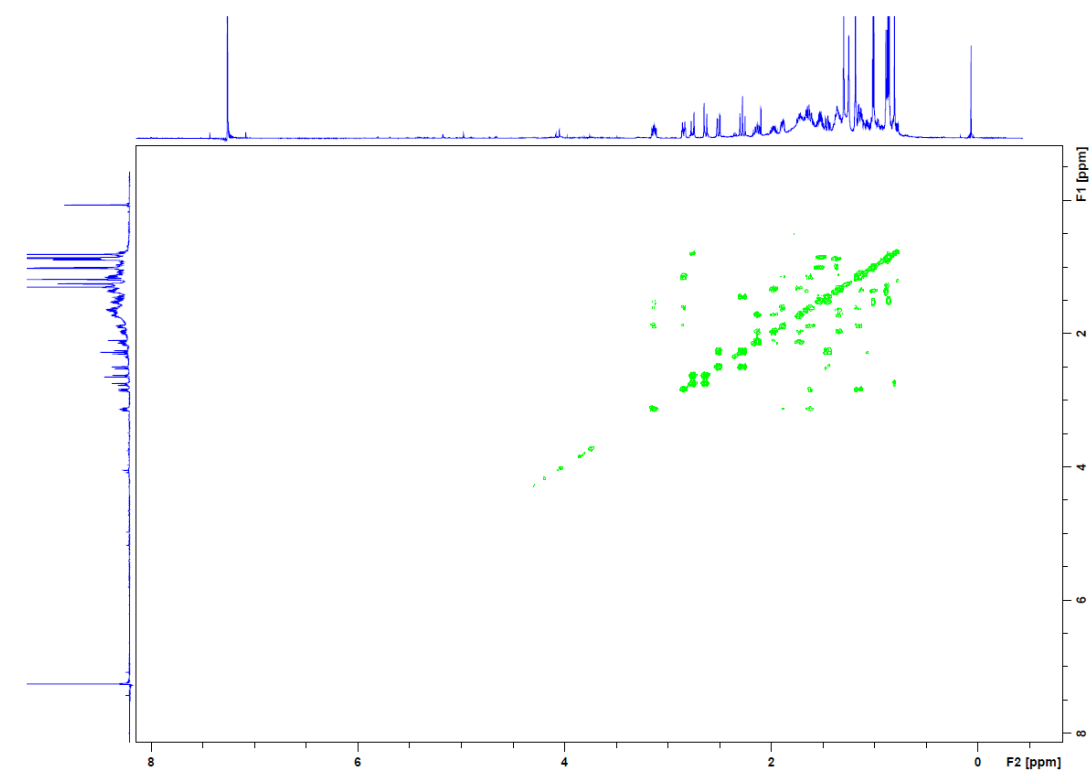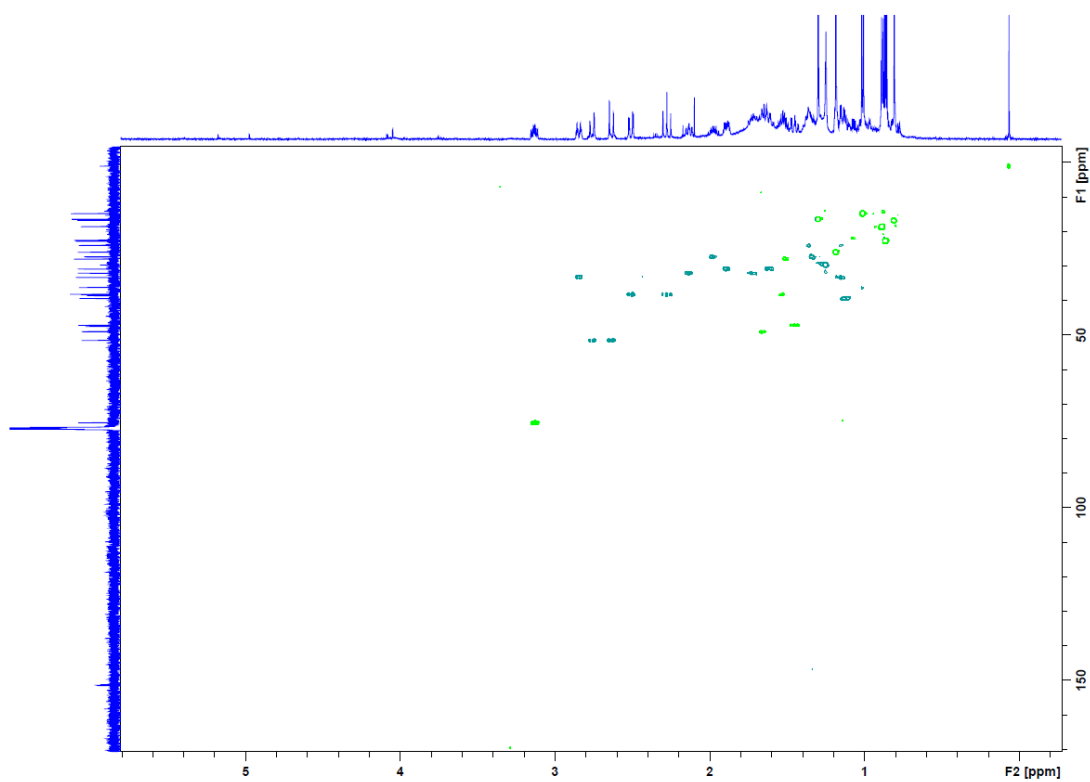

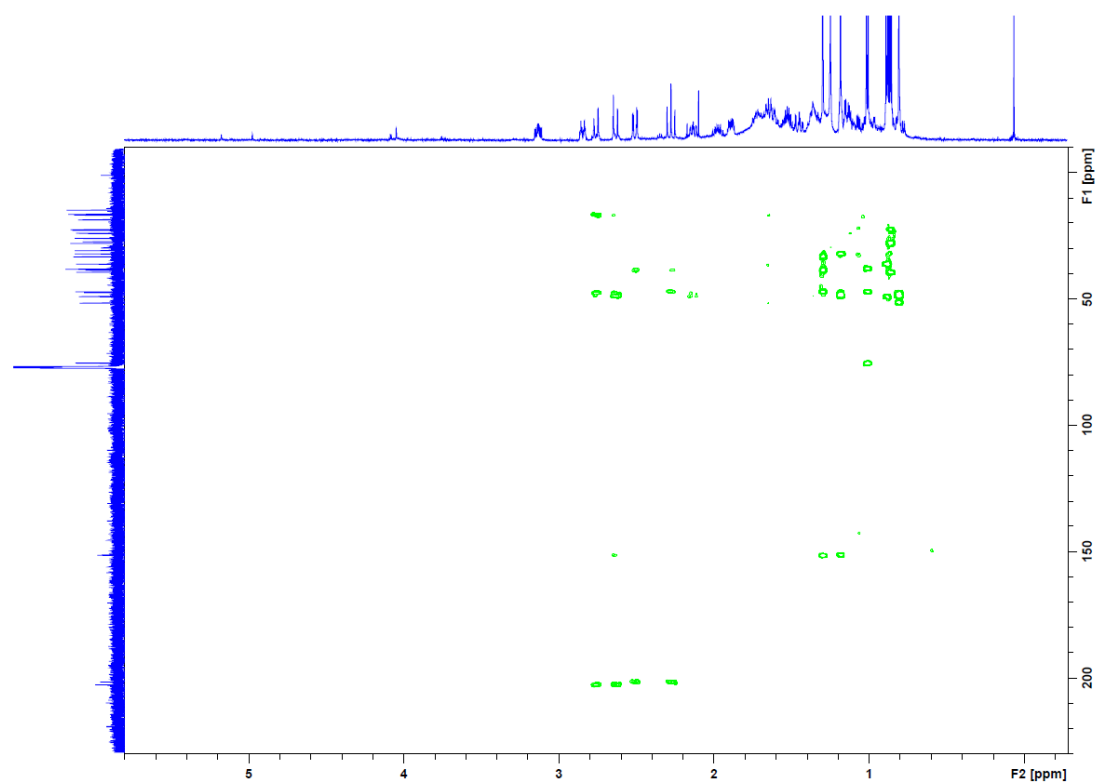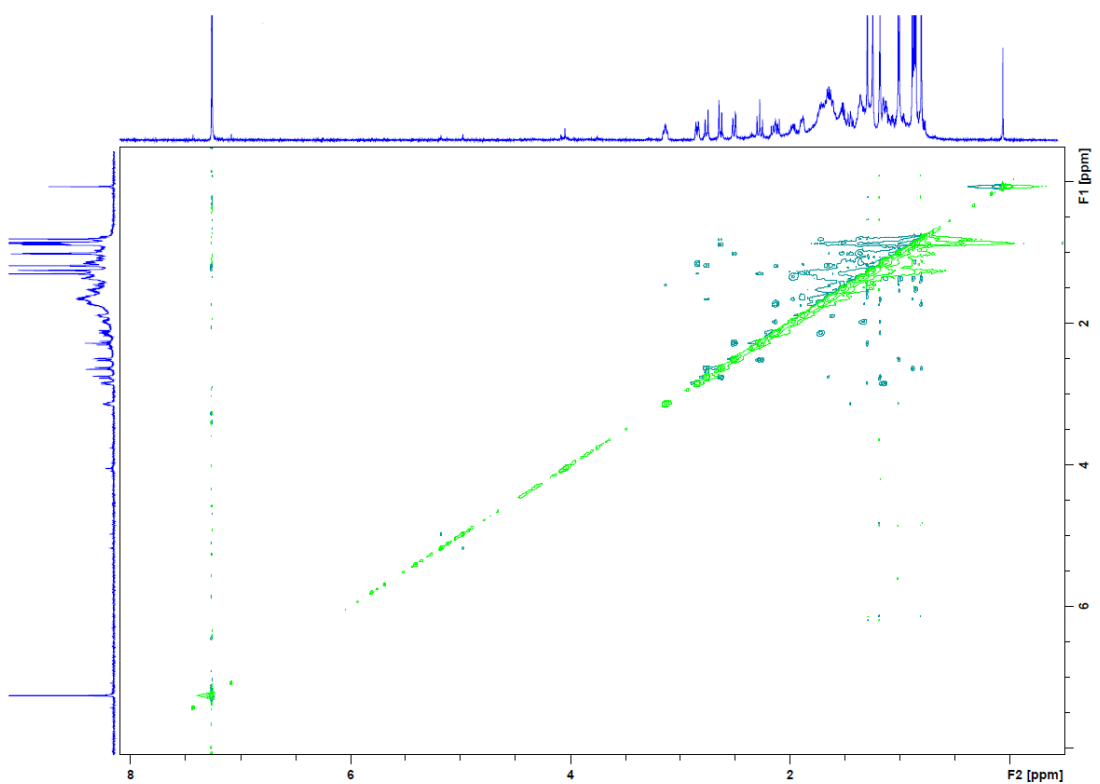

**Figure S3.**  $^1\text{H}$  NMR,  $^{13}\text{C}$  NMR,  $^1\text{H}$  -  $^1\text{H}$  COSY, HSQC, HMBC and NOESY spectra of **2** in  $\text{CDCl}_3$ .

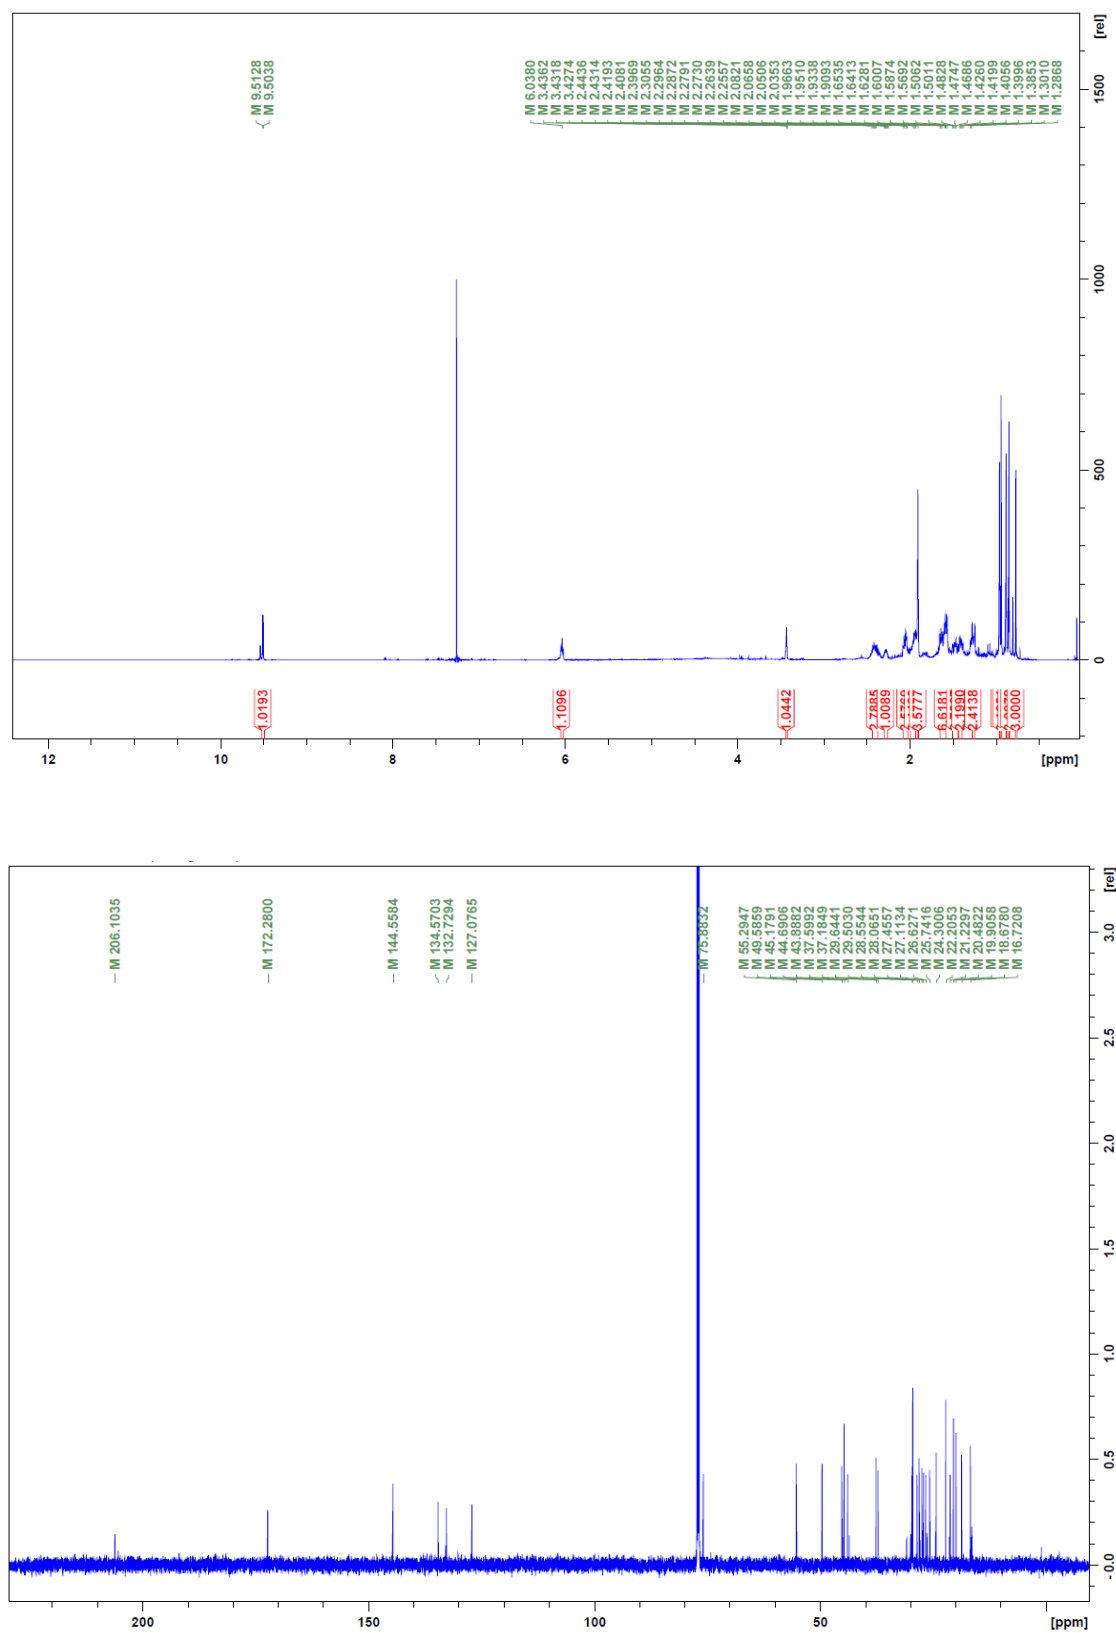

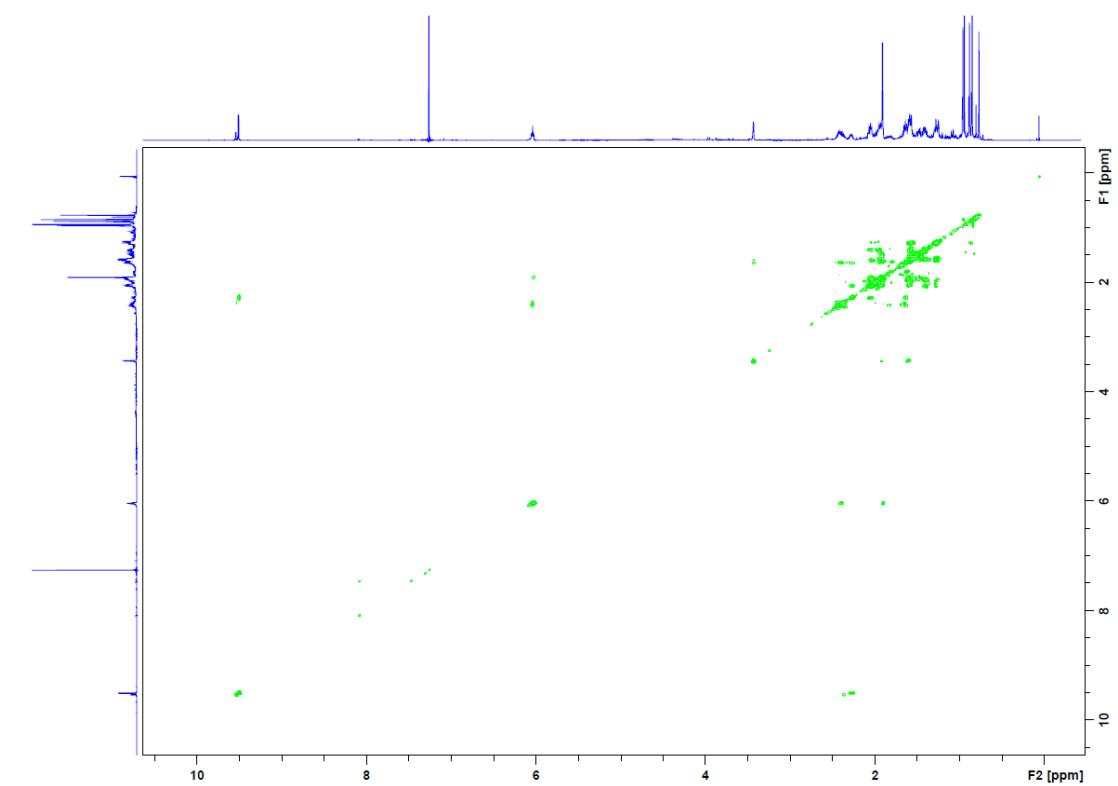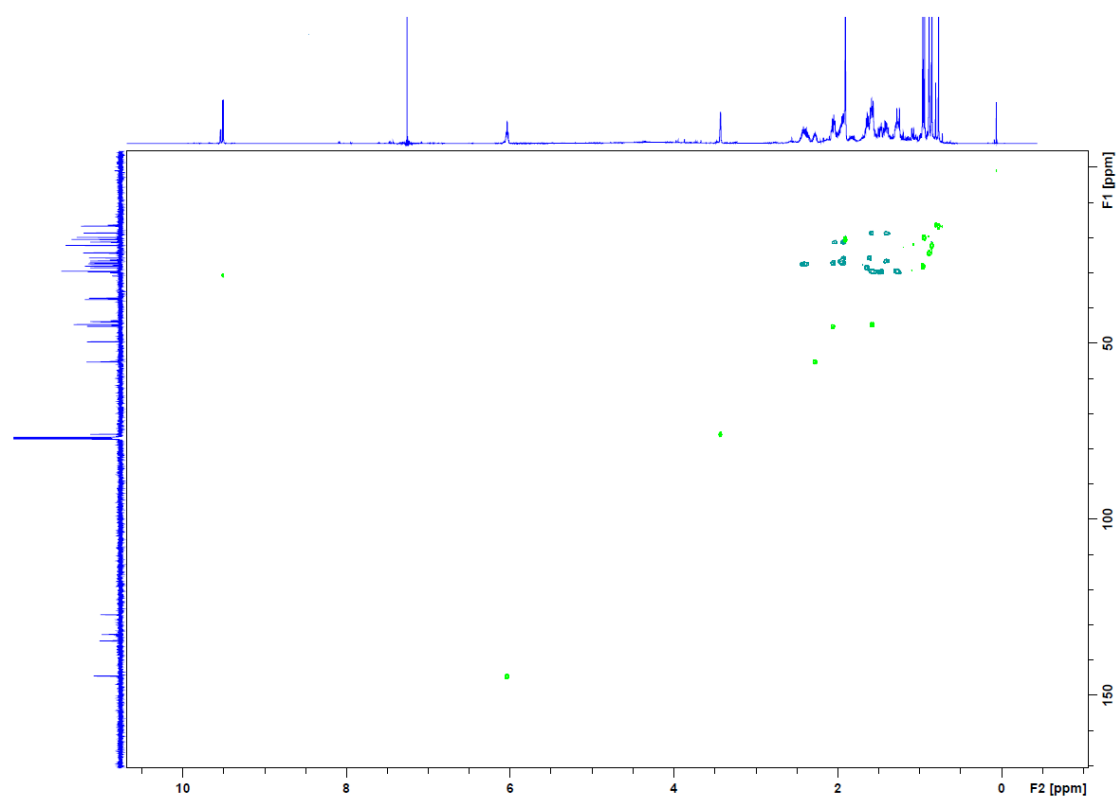



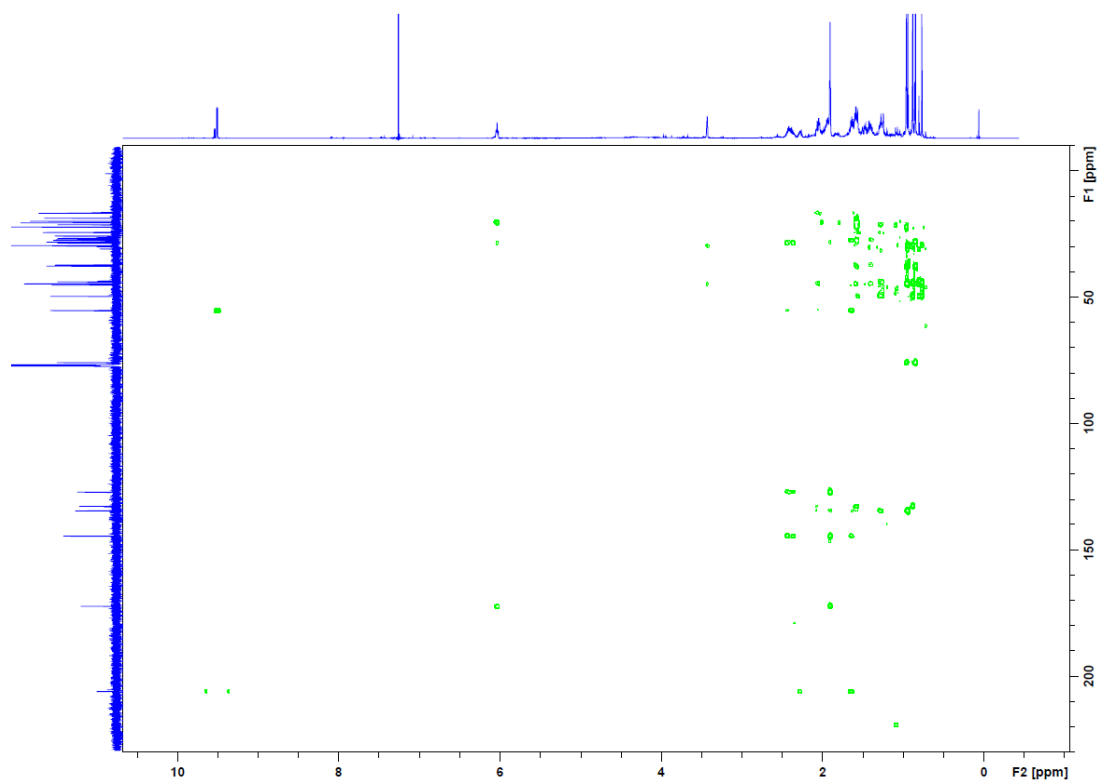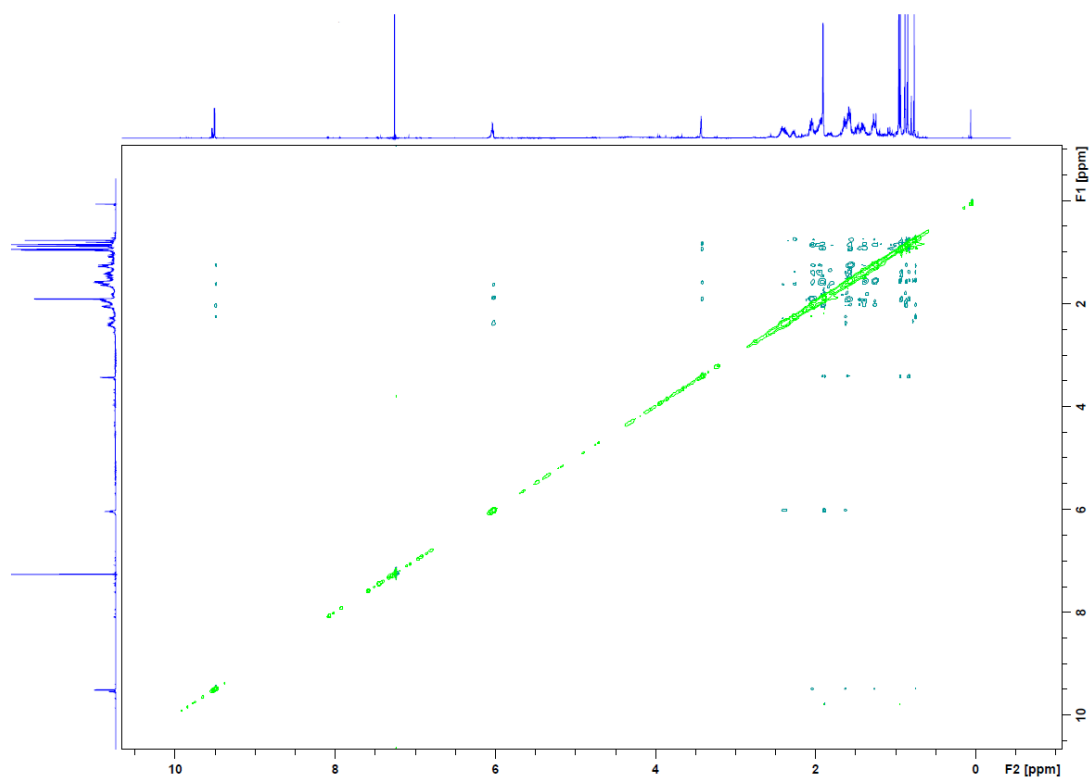

**Figure S4.** HRESIMS spectrum of **3**.

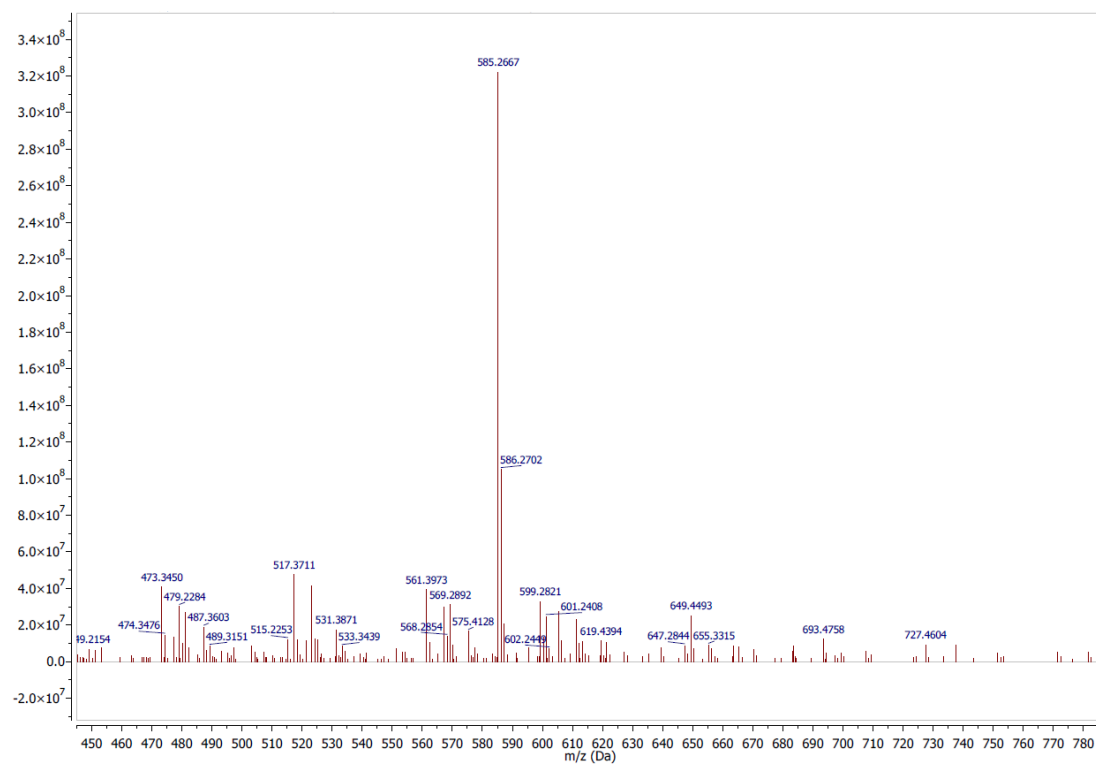

**Figure S5.**  $^1\text{H}$  NMR,  $^1\text{H}$  -  $^1\text{H}$  COSY, HSQC, HMBC and ROESY spectra of **3** in  $\text{CDCl}_3$ .

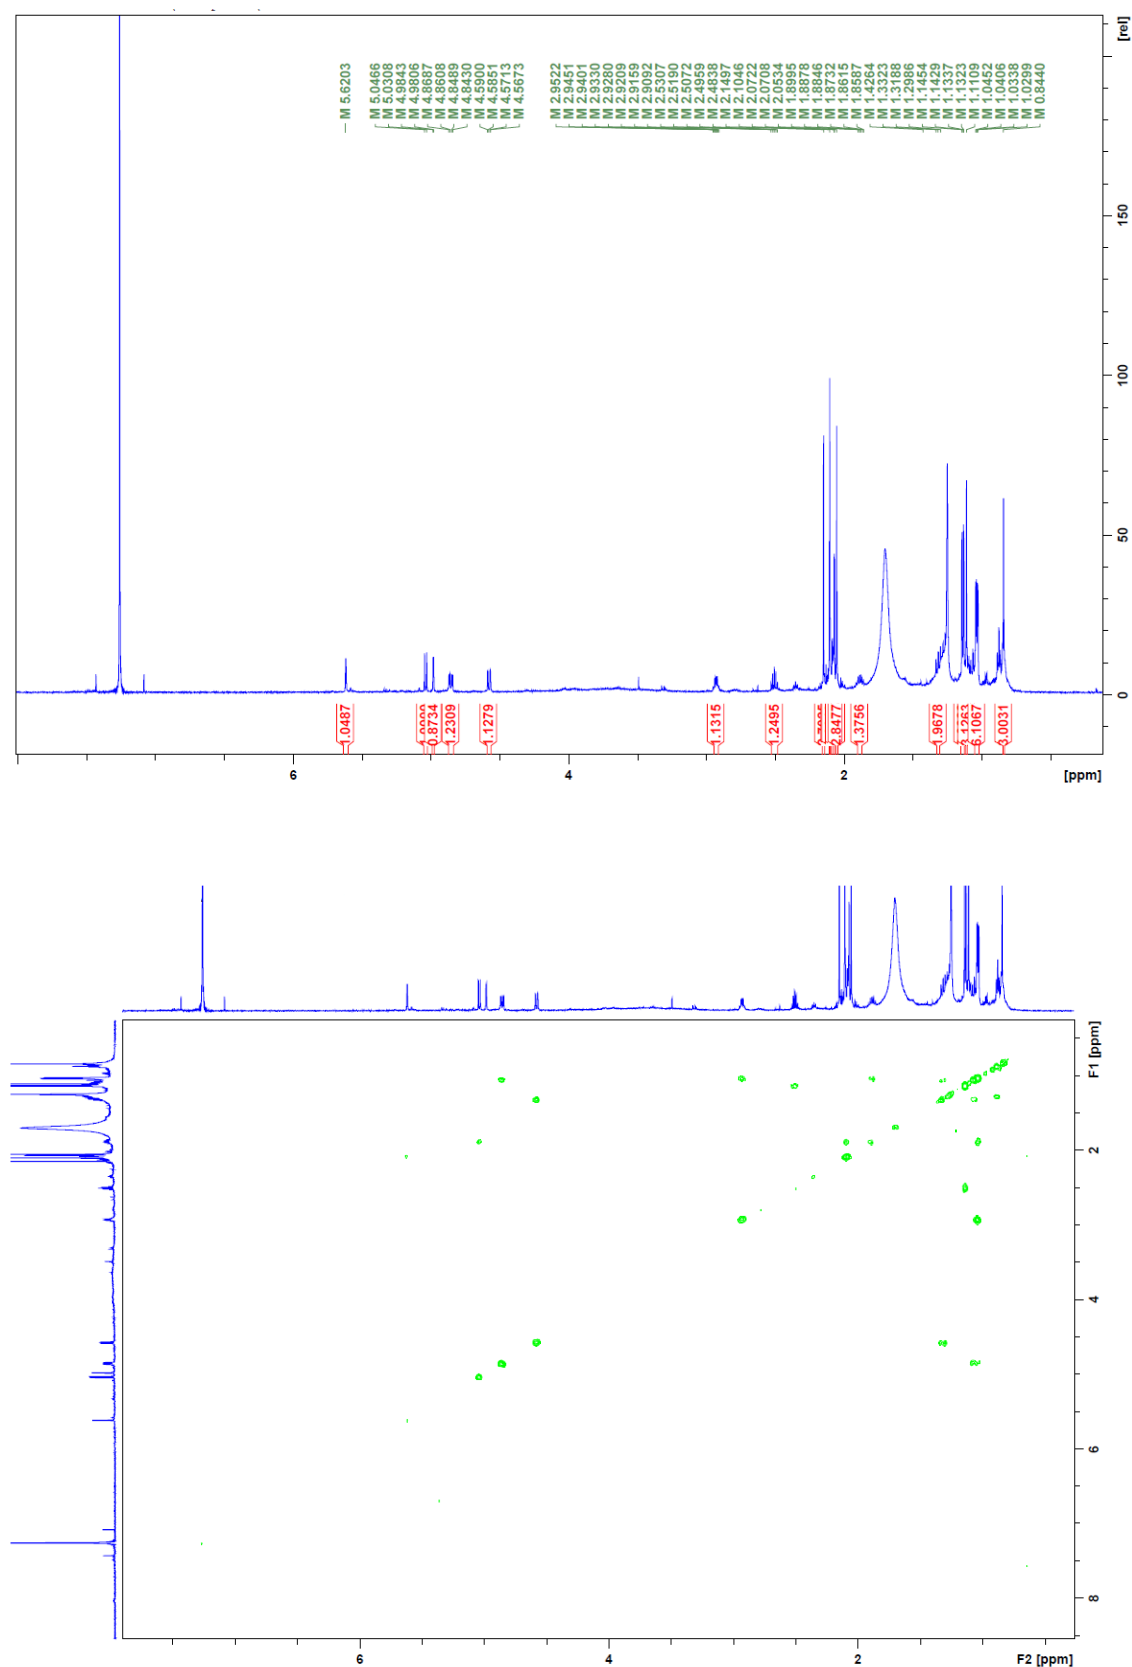

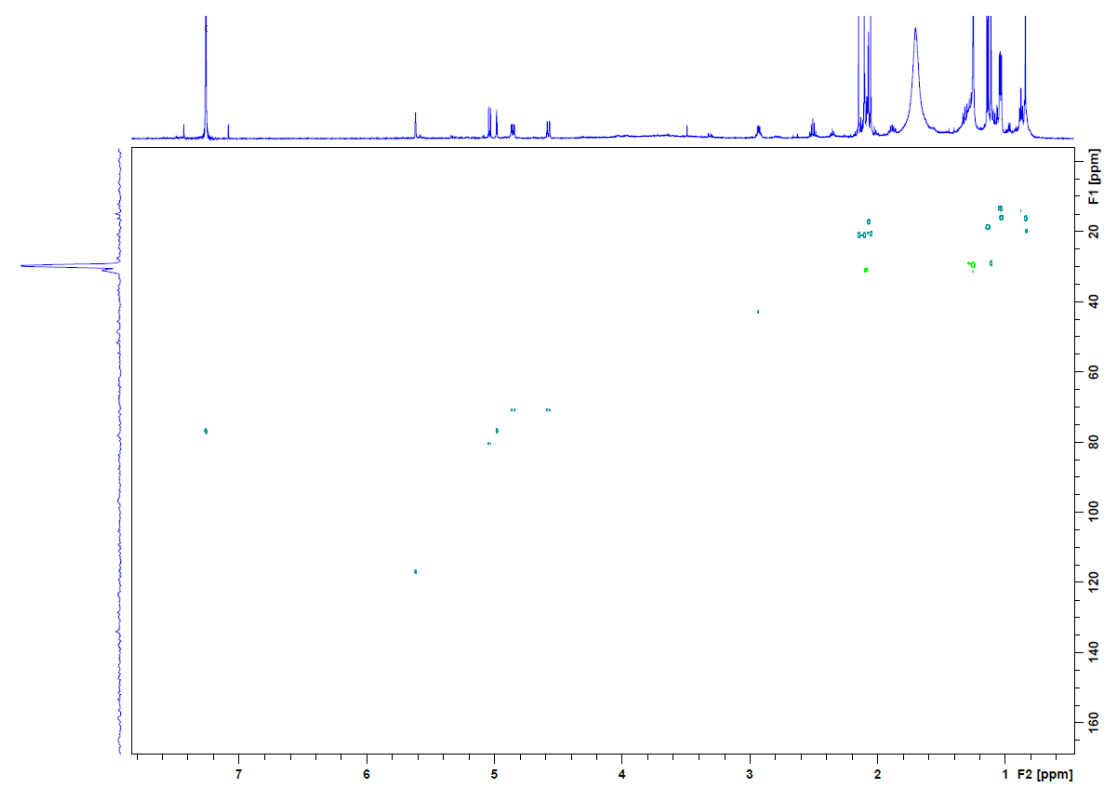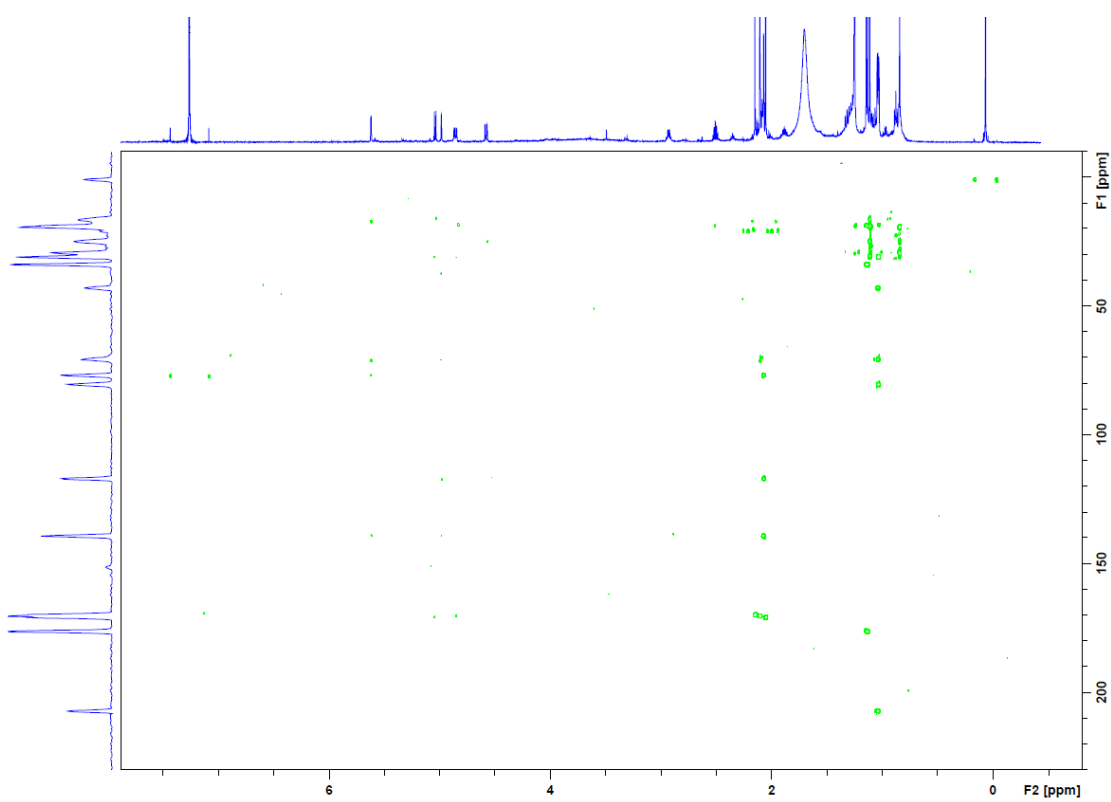

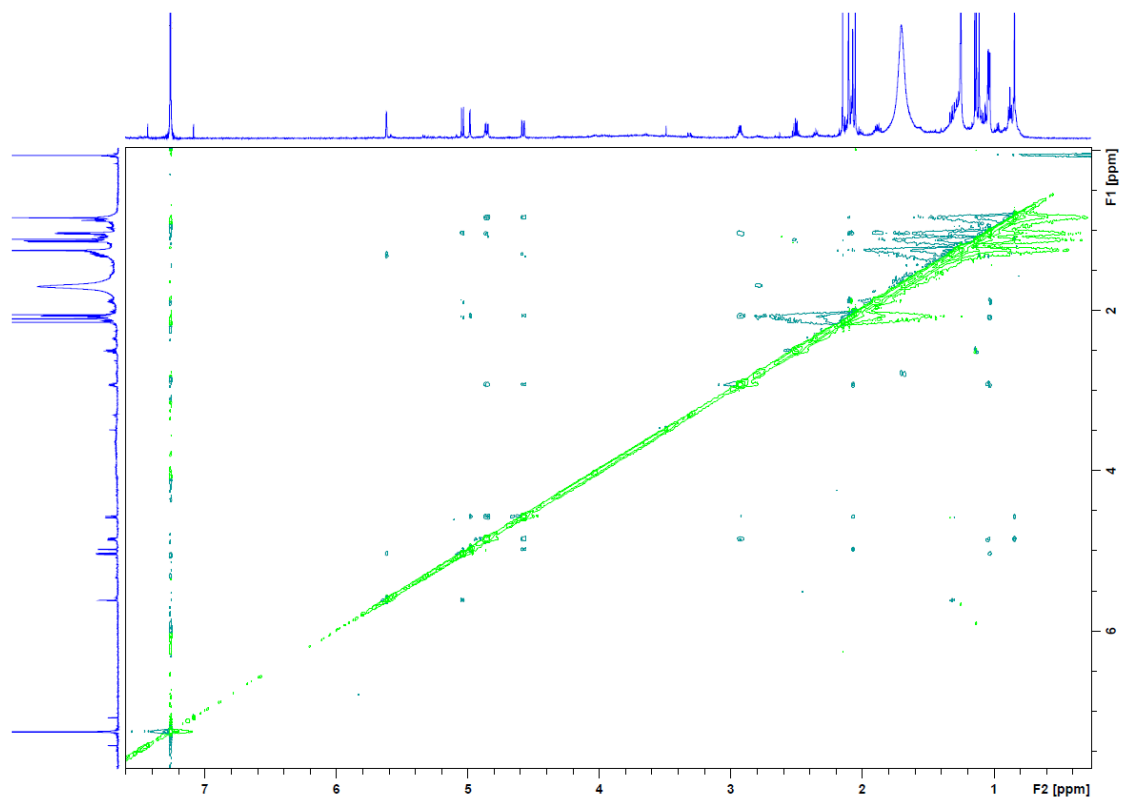

**Figure S6.**  $^1\text{H}$  NMR,  $^{13}\text{C}$  NMR, DEPT,  $^1\text{H}$  -  $^1\text{H}$  COSY, HSQC, HMBC and ROESY spectra of **4** in  $\text{CDCl}_3$ .

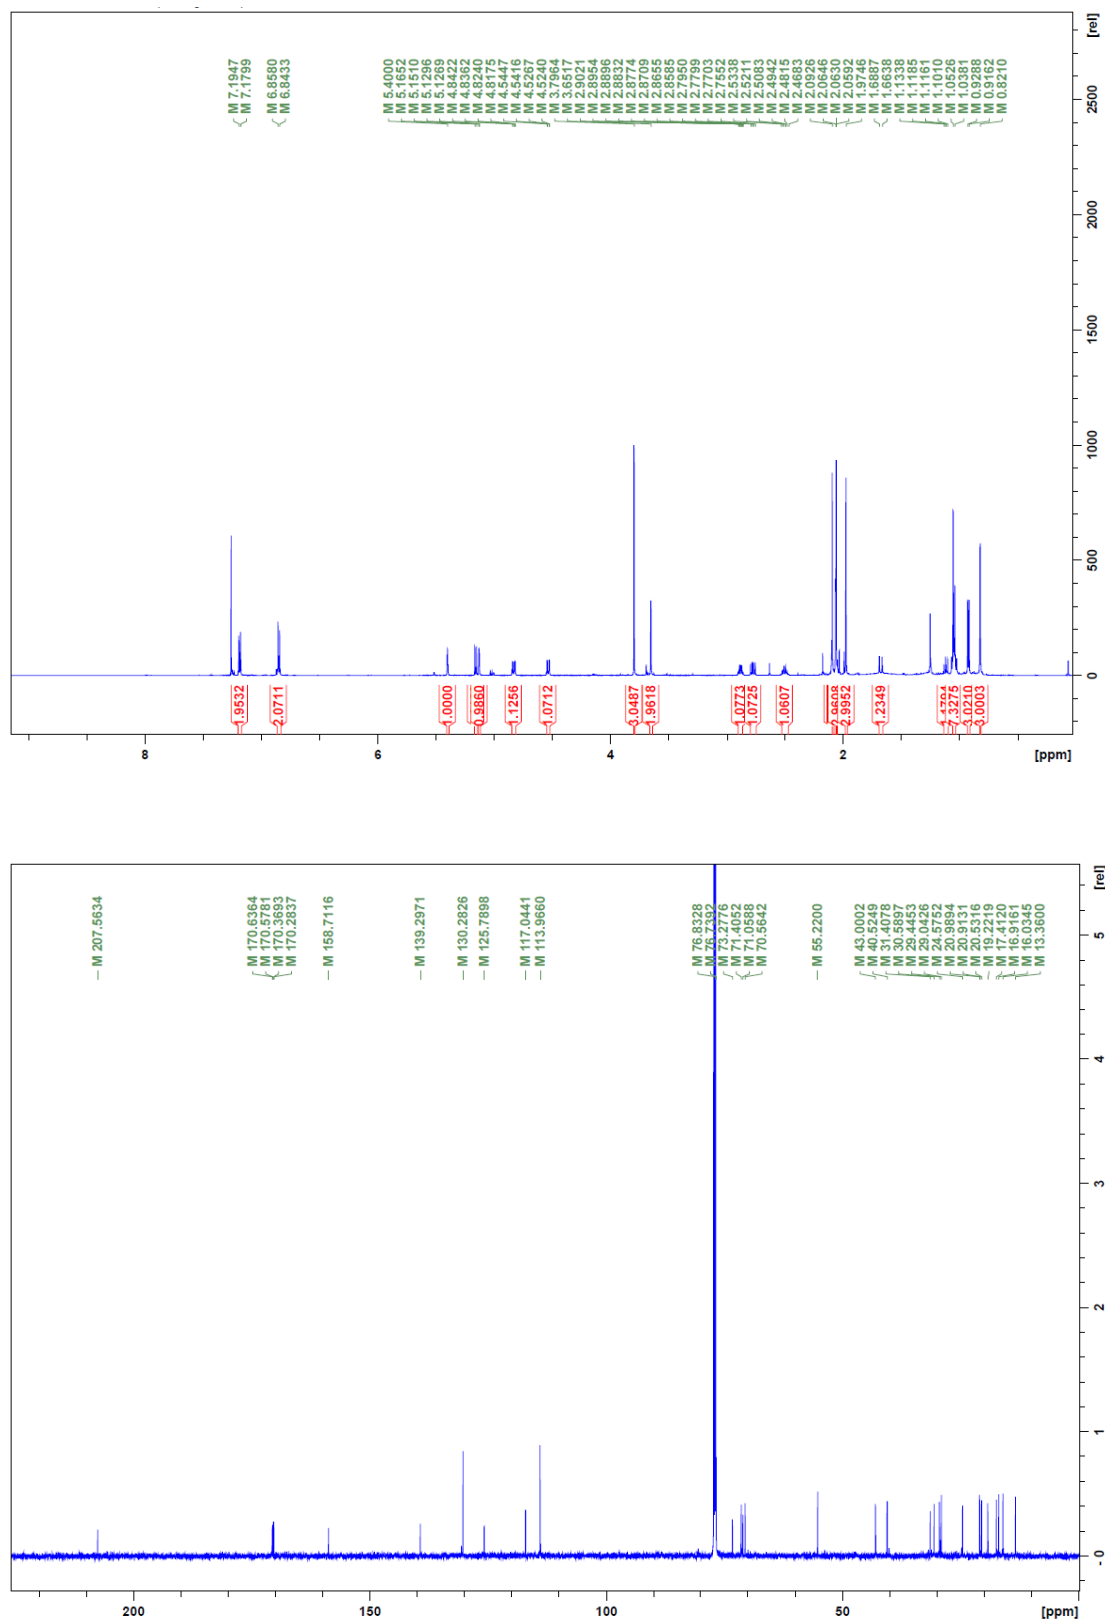

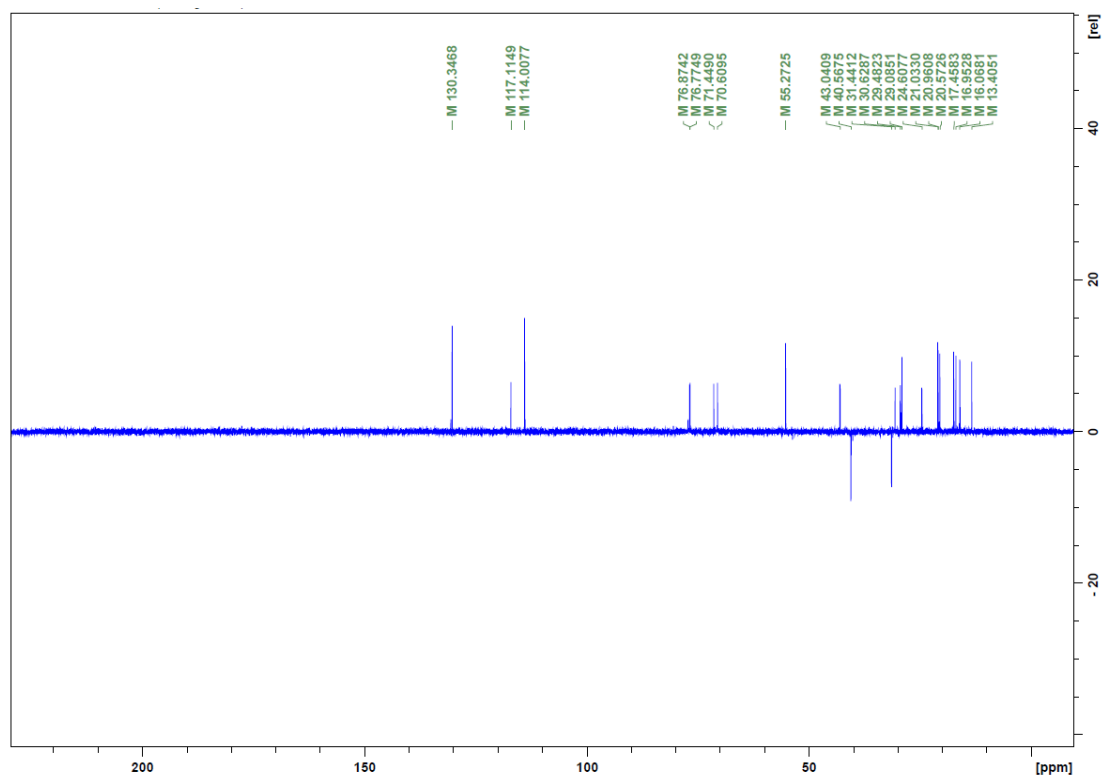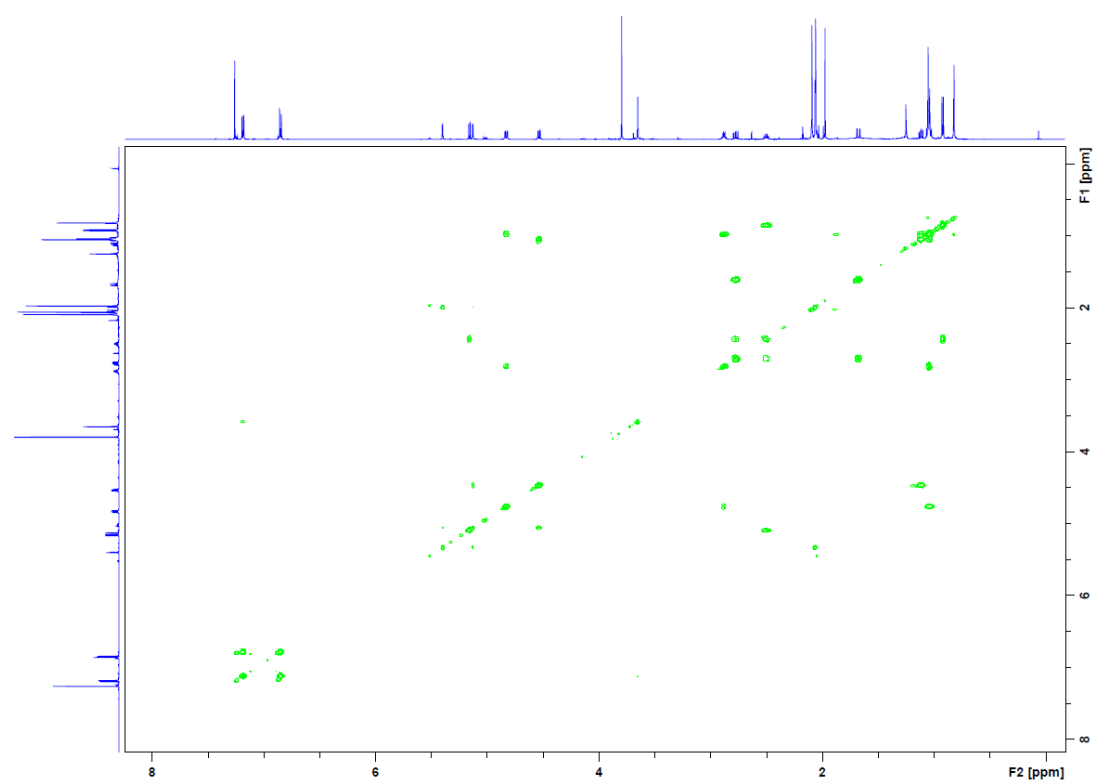

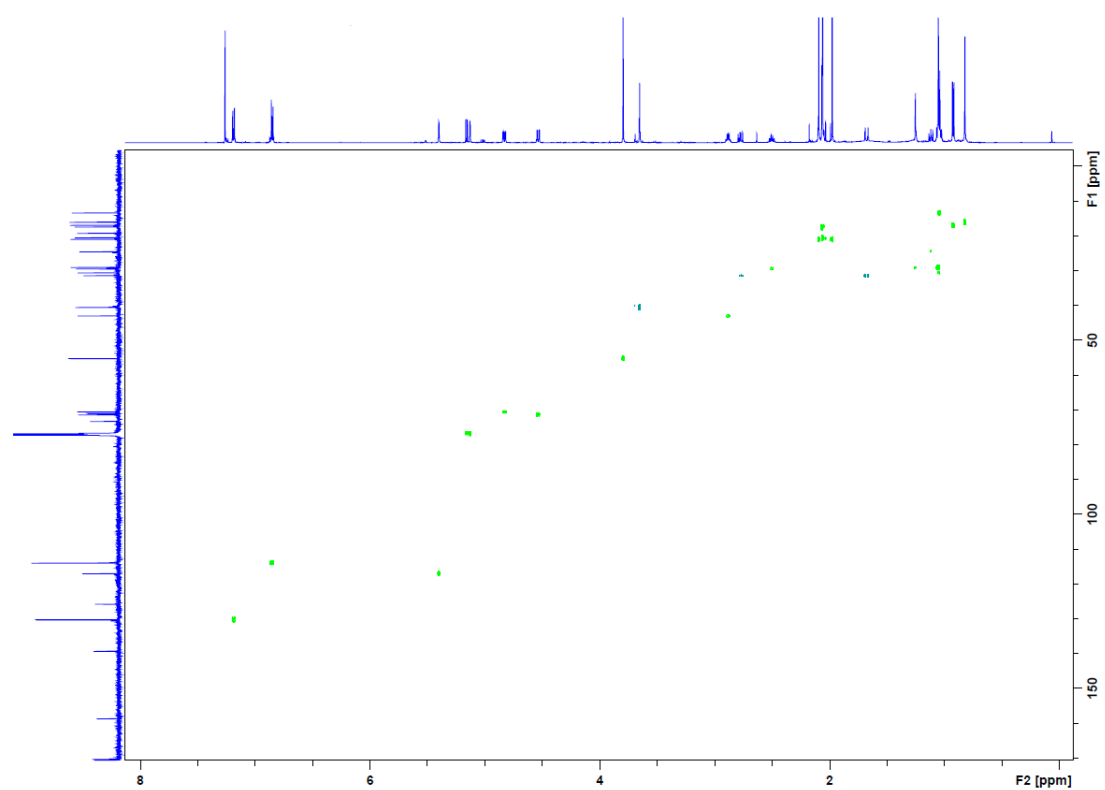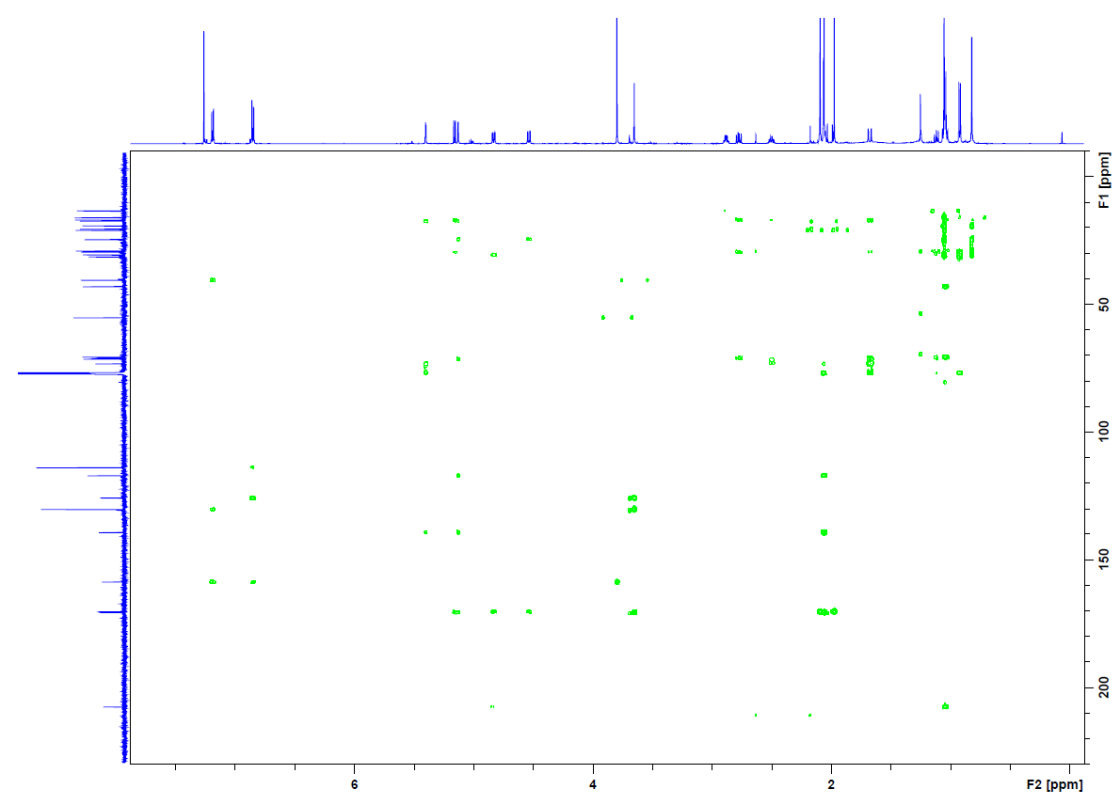



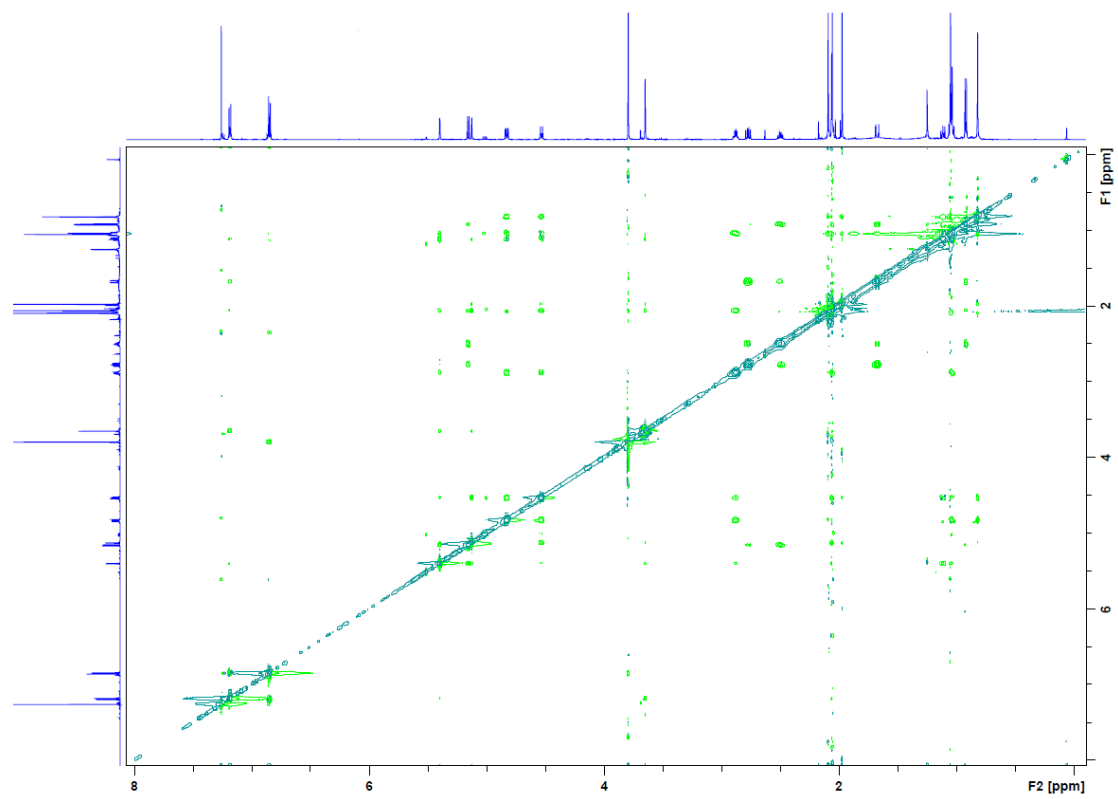

**Figure S7.**  $^1\text{H}$  NMR,  $^{13}\text{C}$  NMR, HSQC and HMBC spectra of **4** in acetone- $d_6$ .

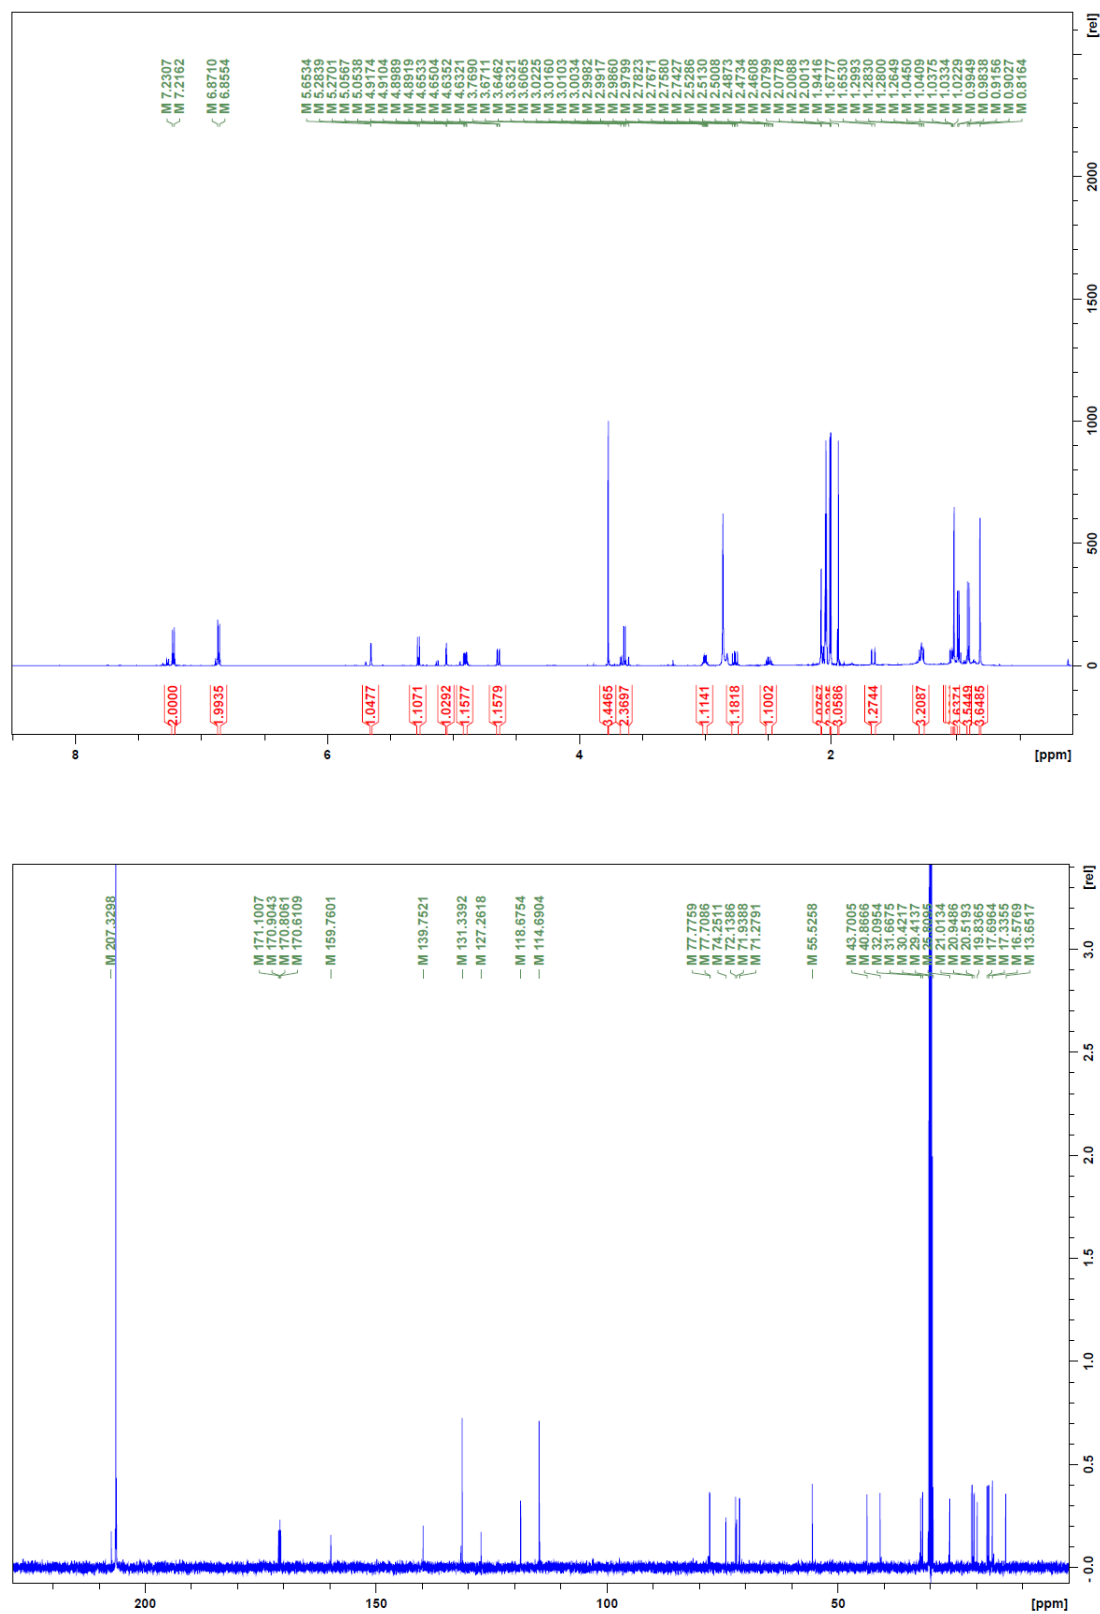

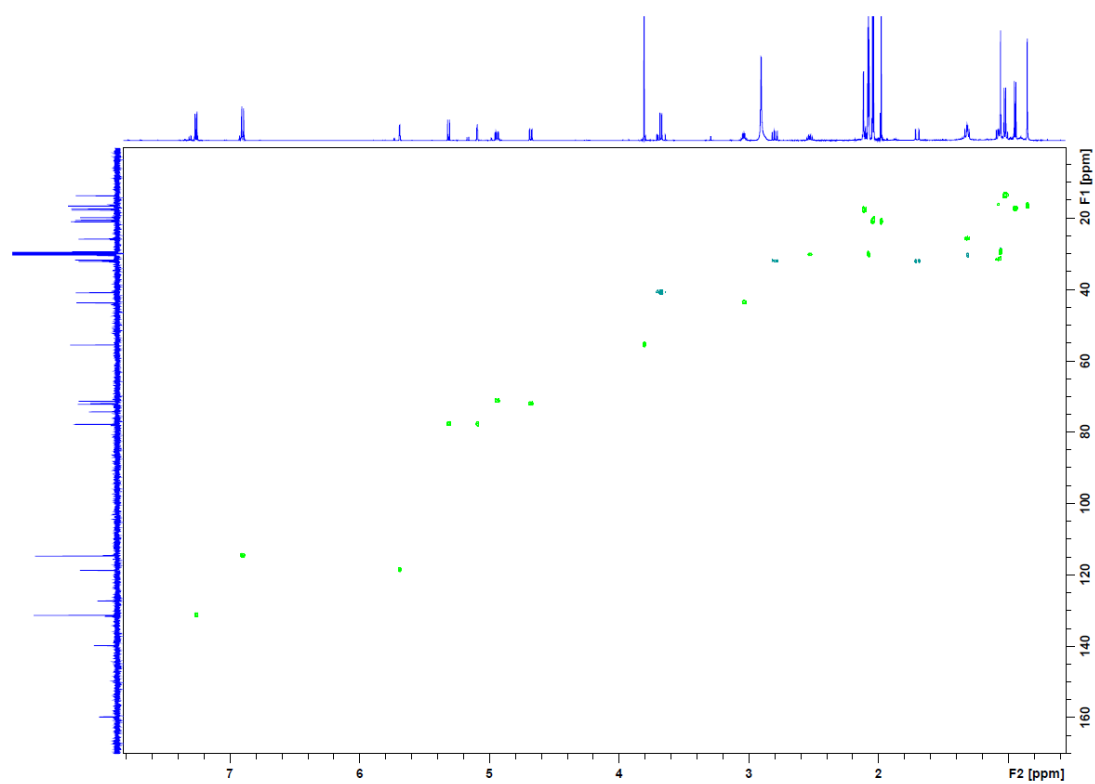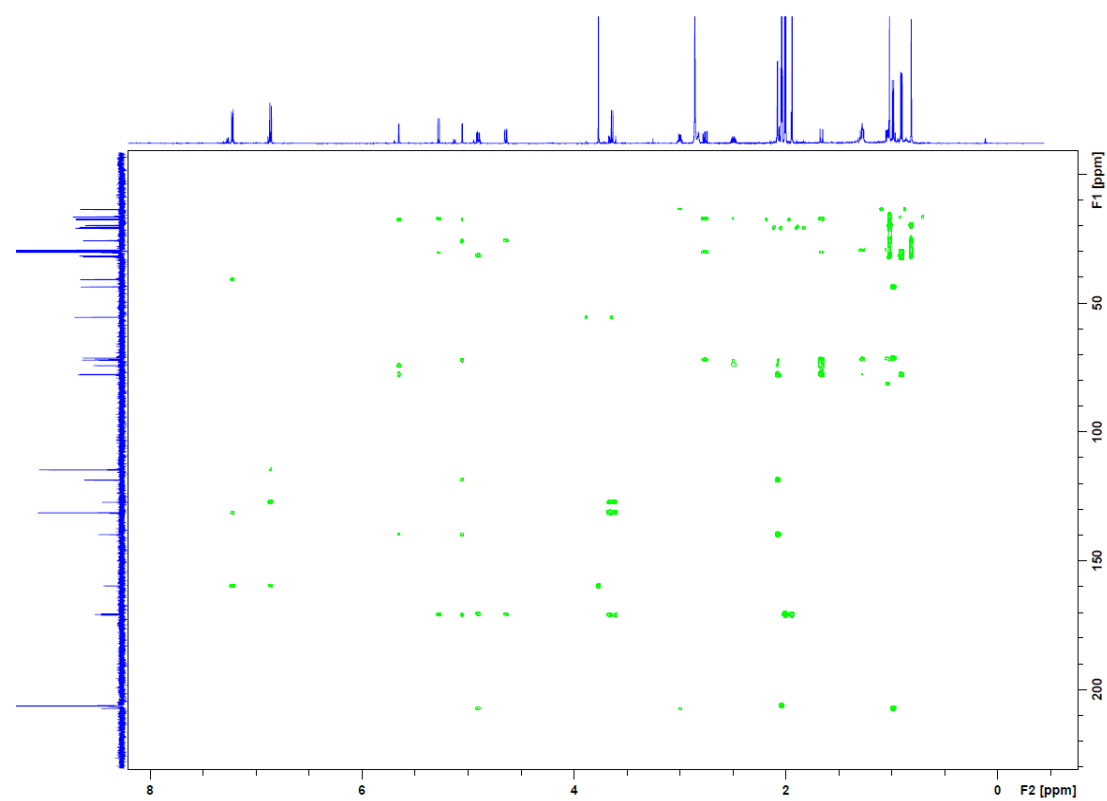

**Figure S8.**  $^1\text{H}$  NMR,  $^{13}\text{C}$  NMR, HSQC, HMBC and ROESY spectra of **5** in  $\text{CDCl}_3$ .

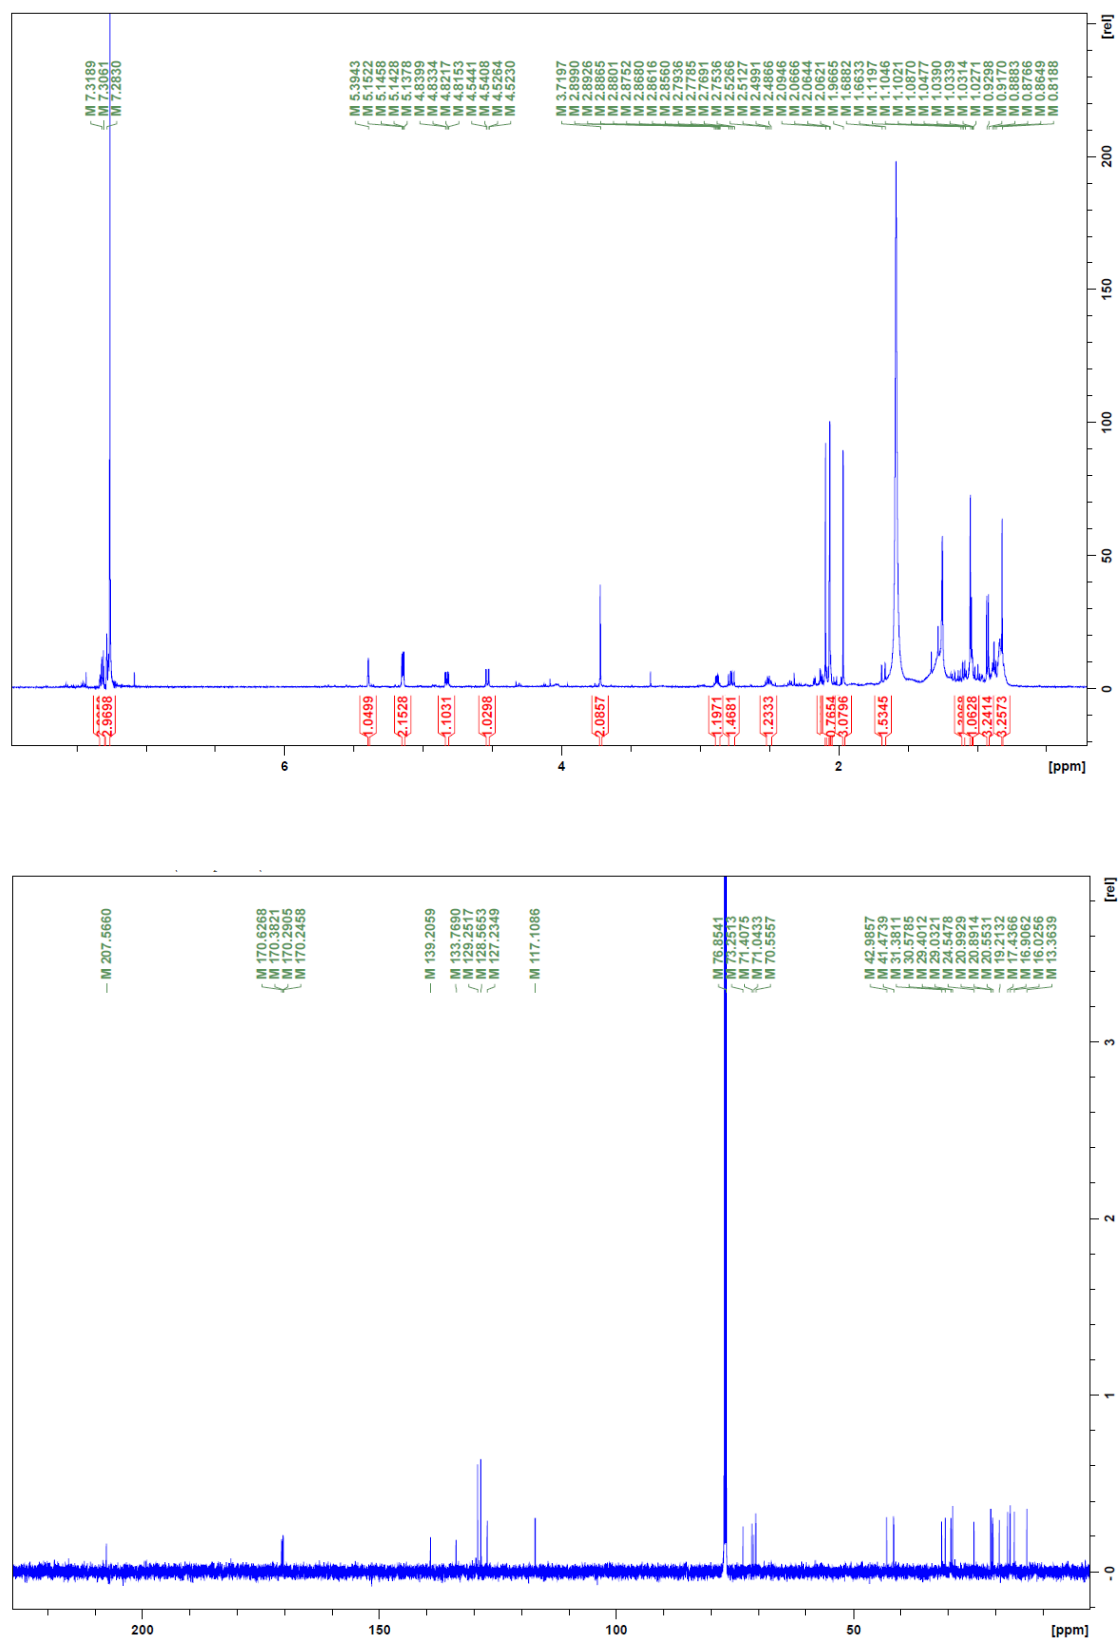

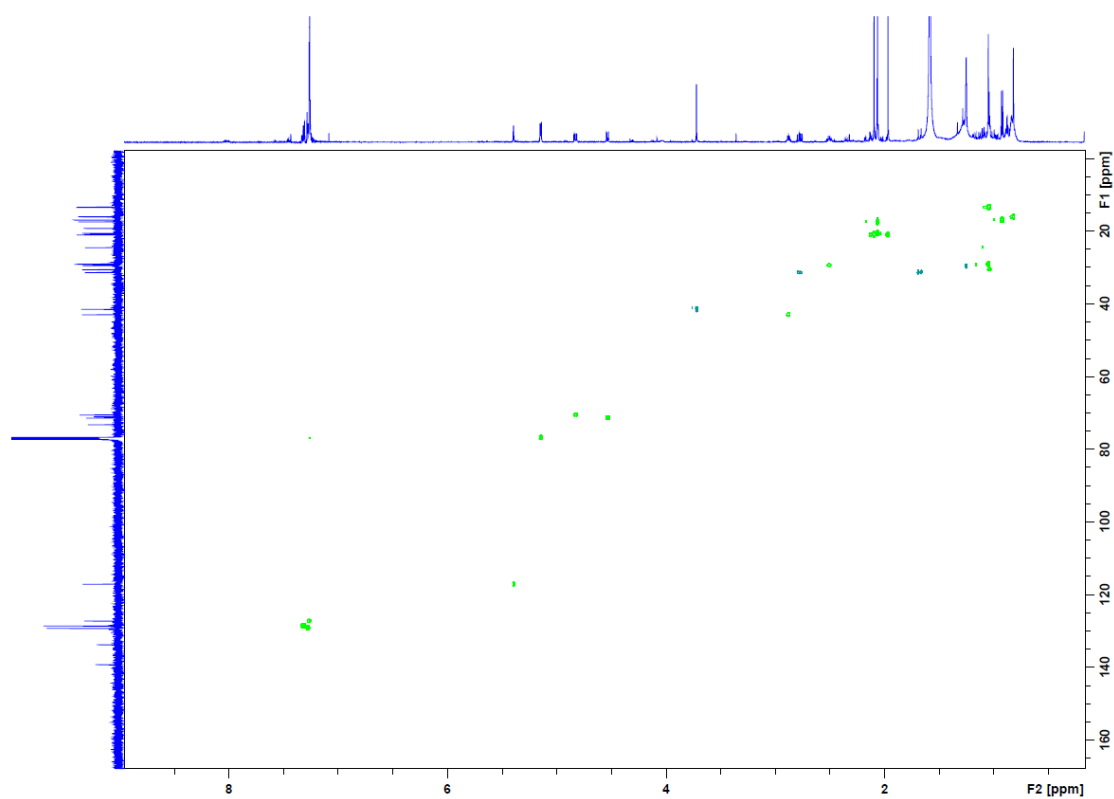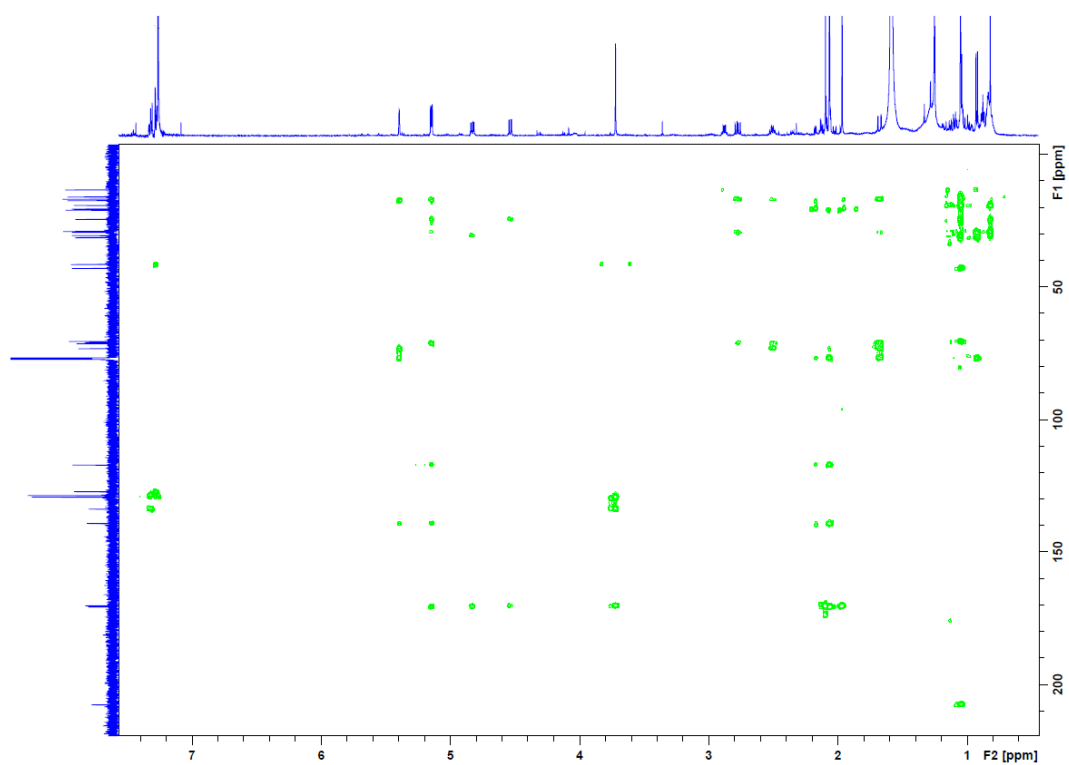

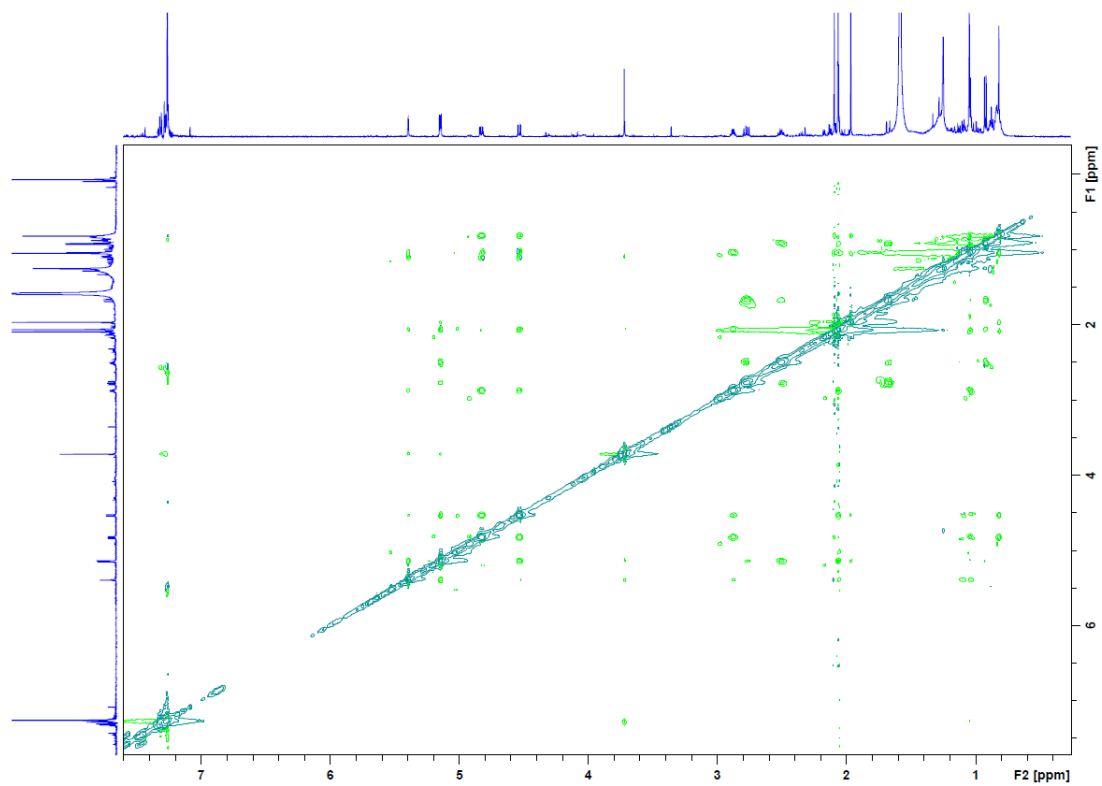

**Figure S9.**  $^1\text{H}$  NMR,  $^{13}\text{C}$  NMR, HSQC, HMBC and ROESY spectra of **5** in acetone- $d_6$ .

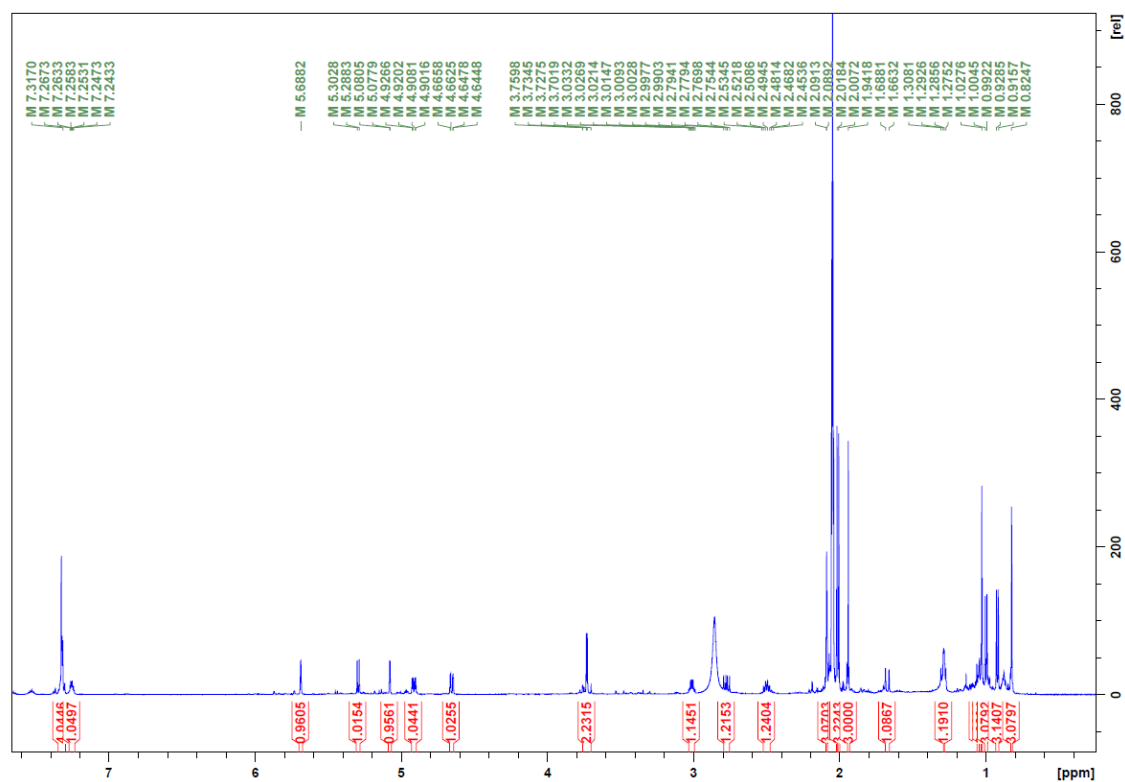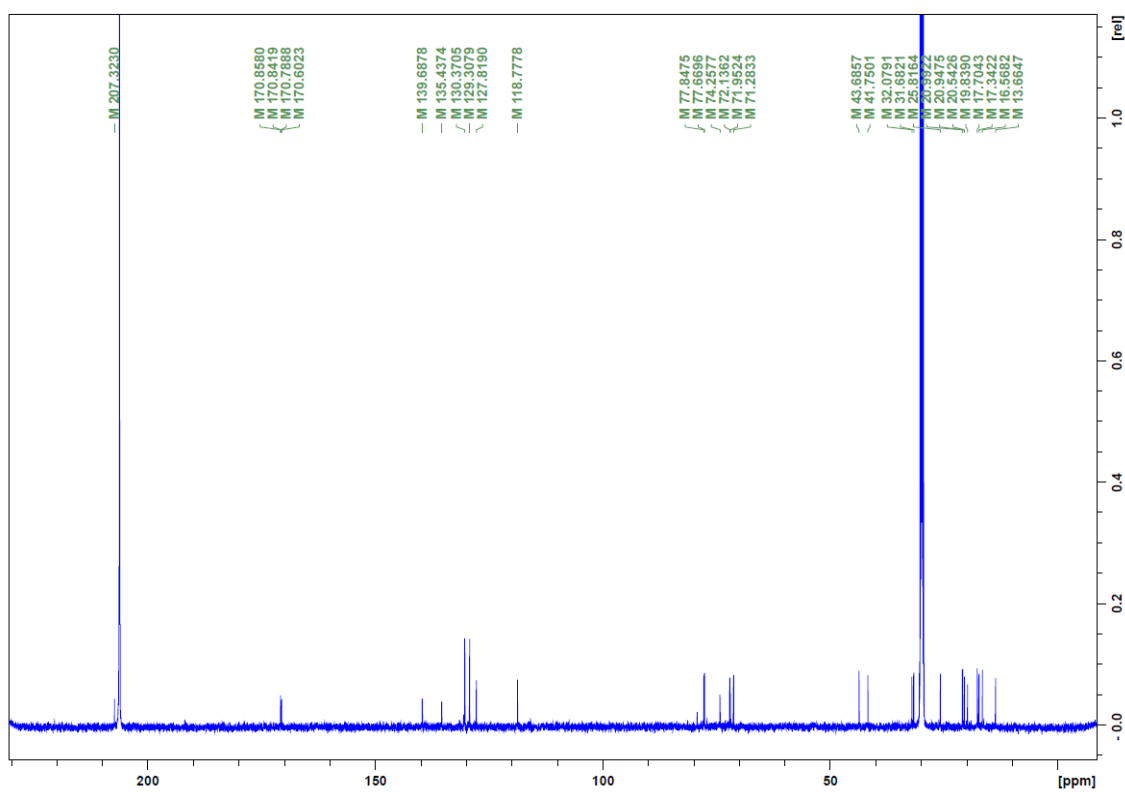

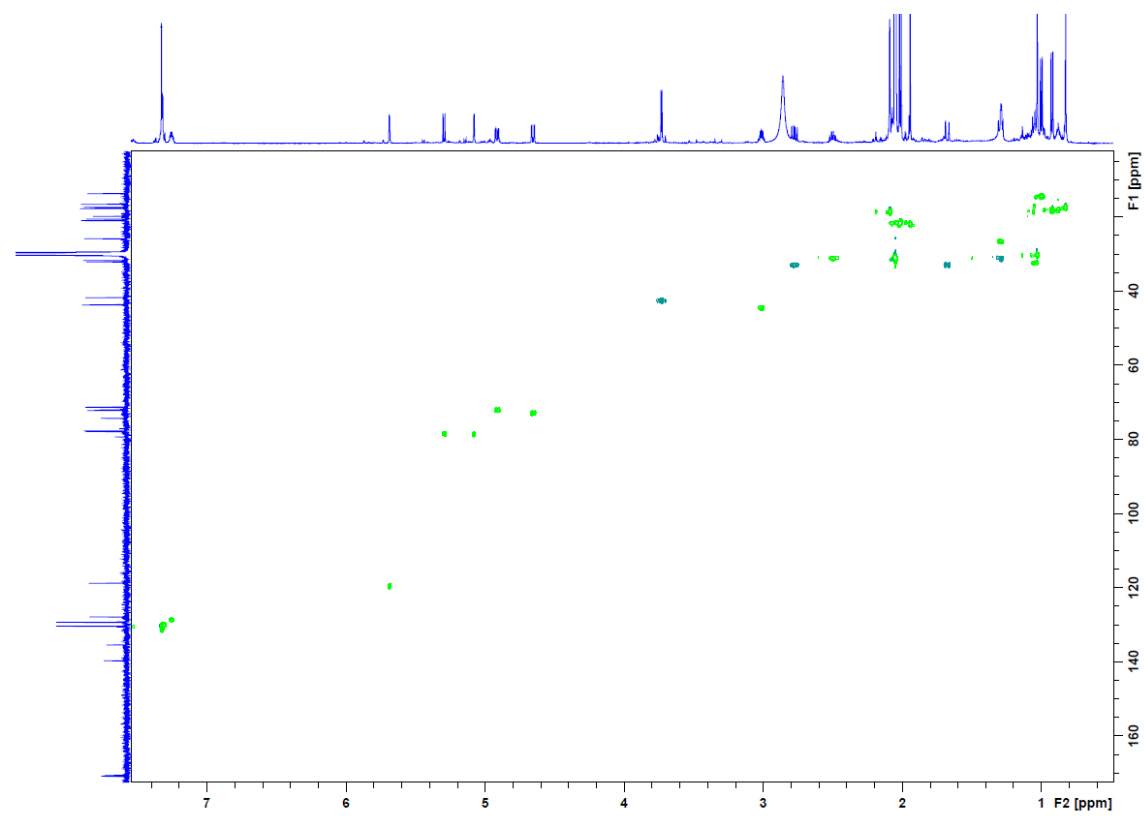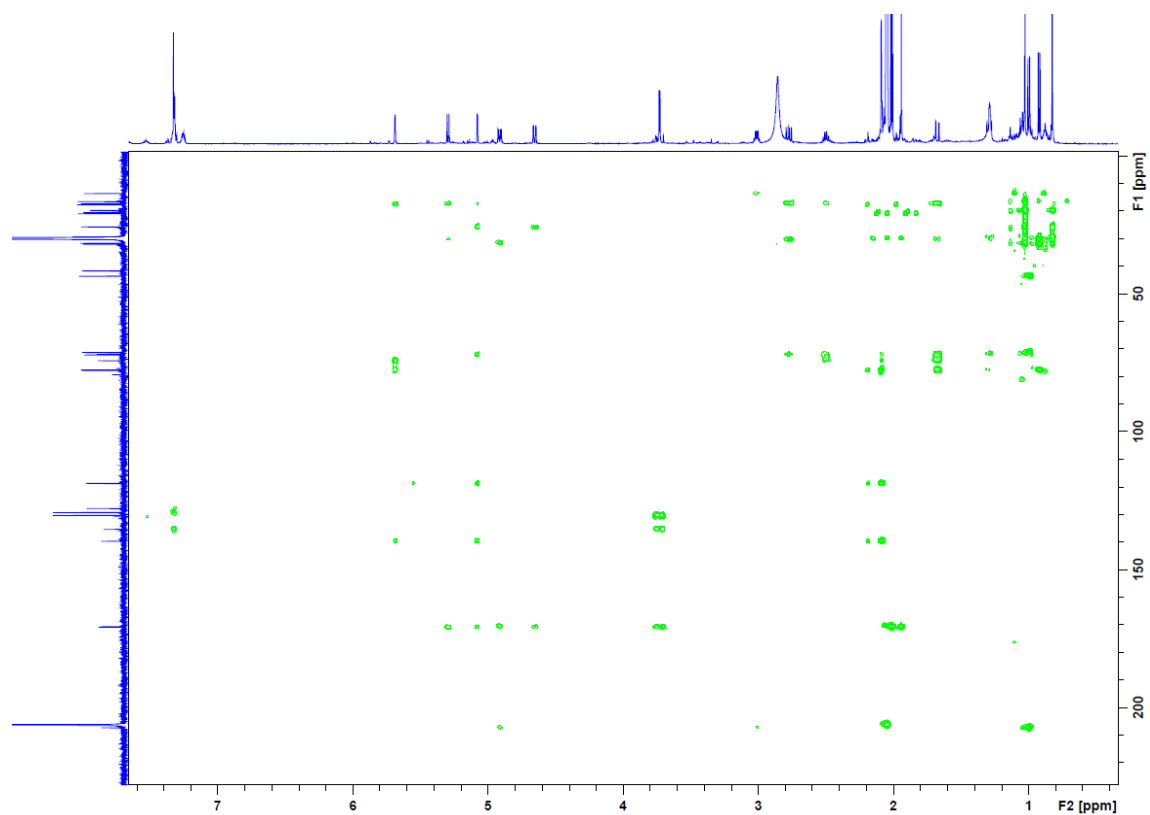



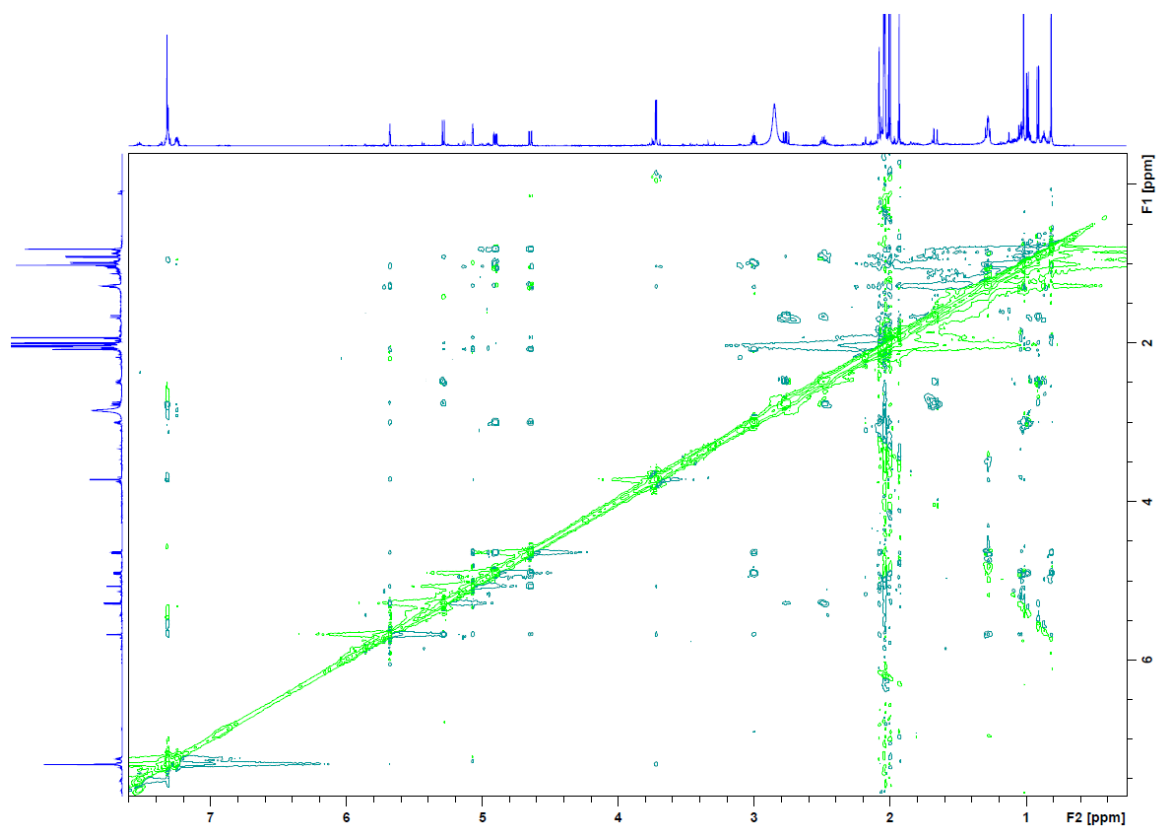

**Figure S10.**  $^1\text{H}$  NMR spectrum of **6** in  $\text{CDCl}_3$ .

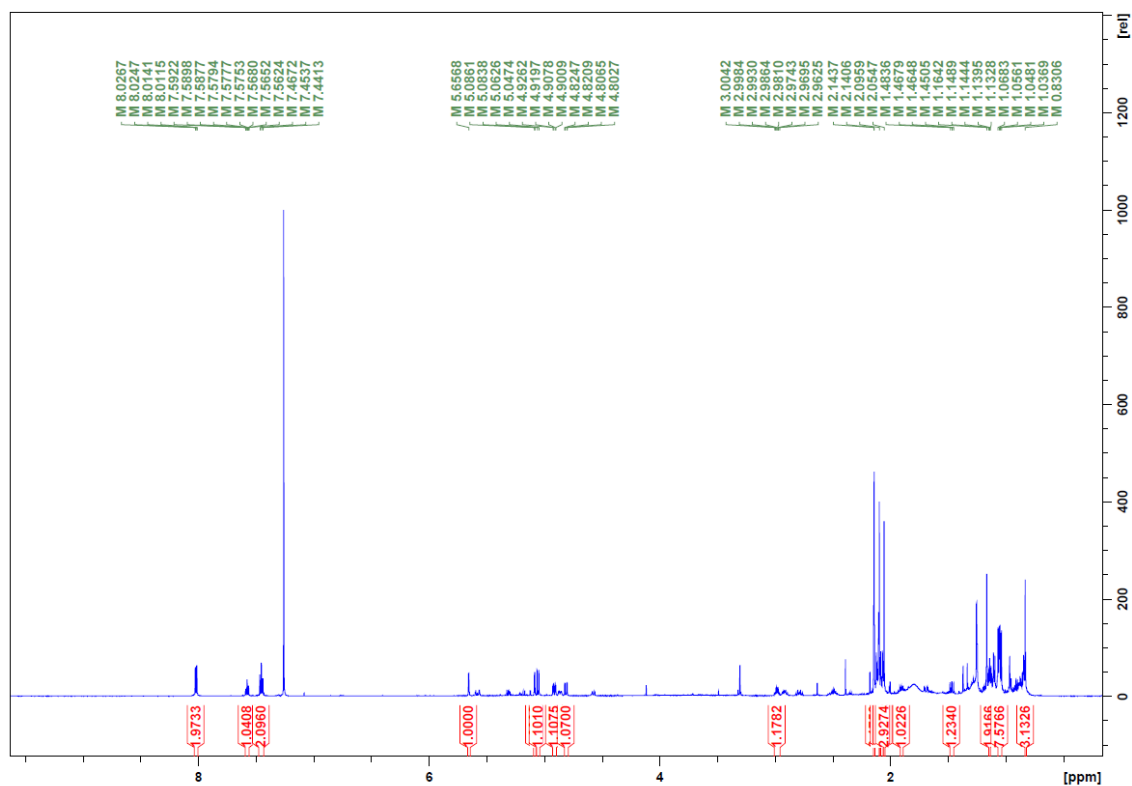

**Figure S11.**  $^1\text{H}$  NMR spectrum of **7** in  $\text{CDCl}_3$ .

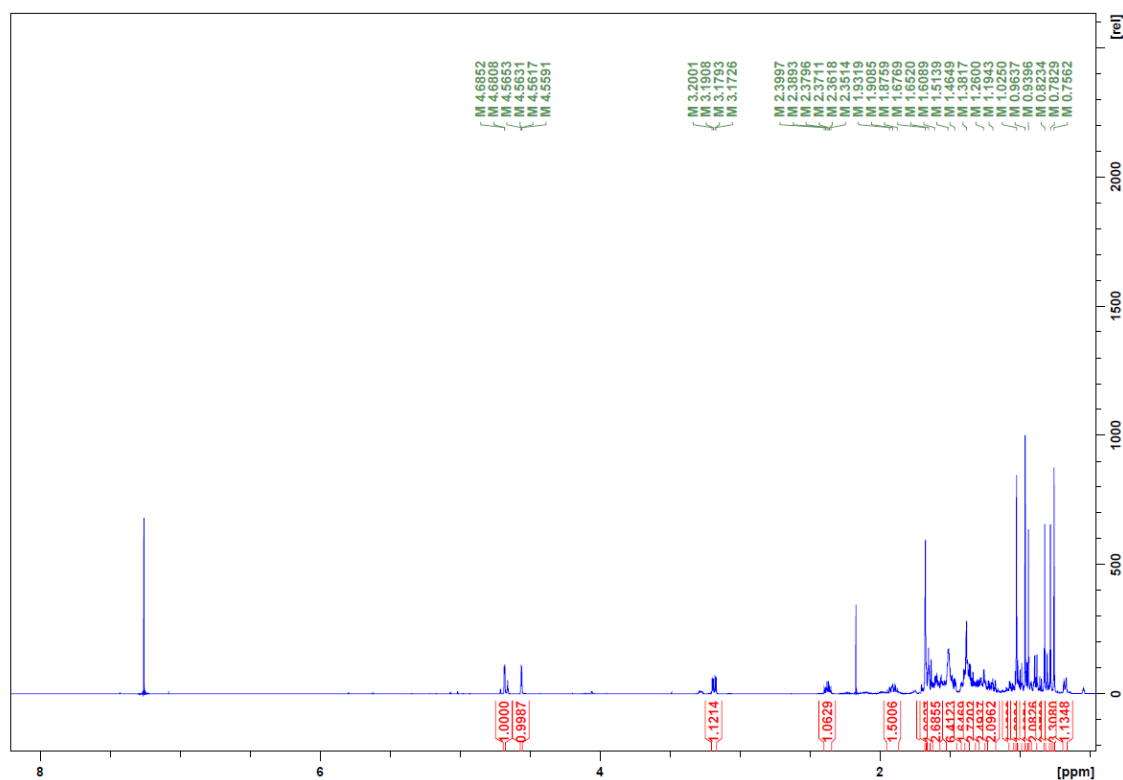

**Figure S12.**  $^1\text{H}$  NMR spectrum of **8** in  $\text{CDCl}_3$ .

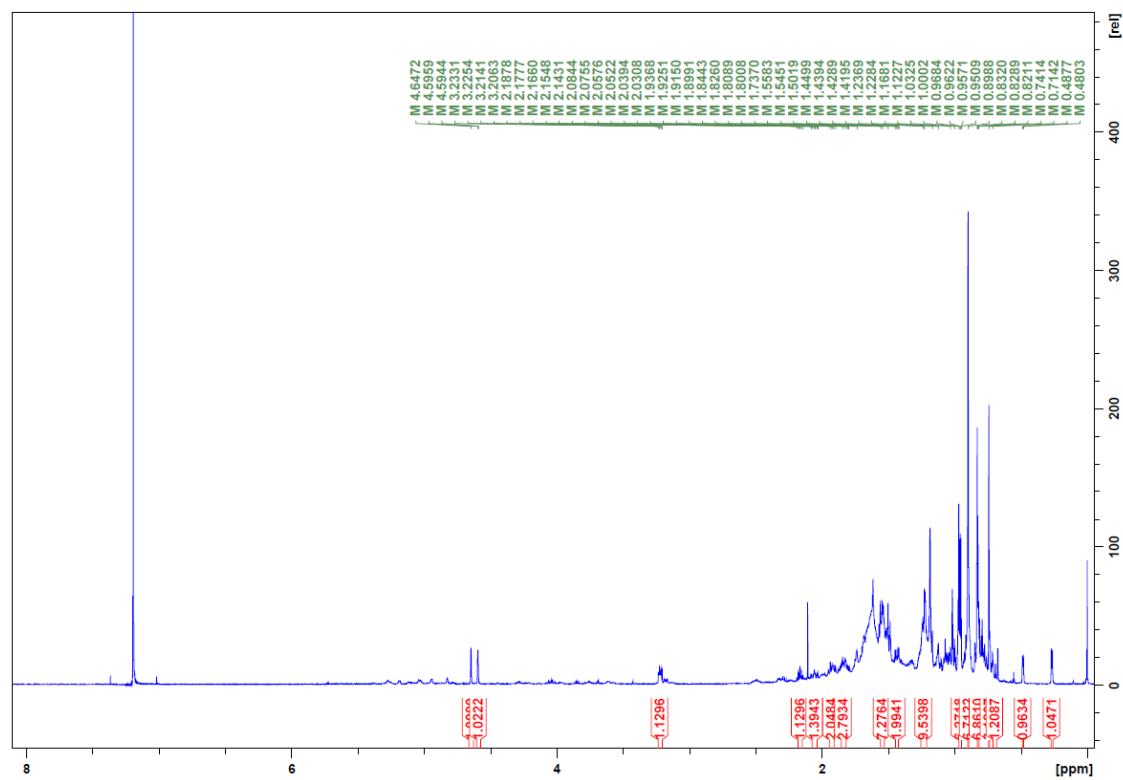

**Figure S13.**  $^1\text{H}$  NMR spectrum of **9** in  $\text{CDCl}_3$ .

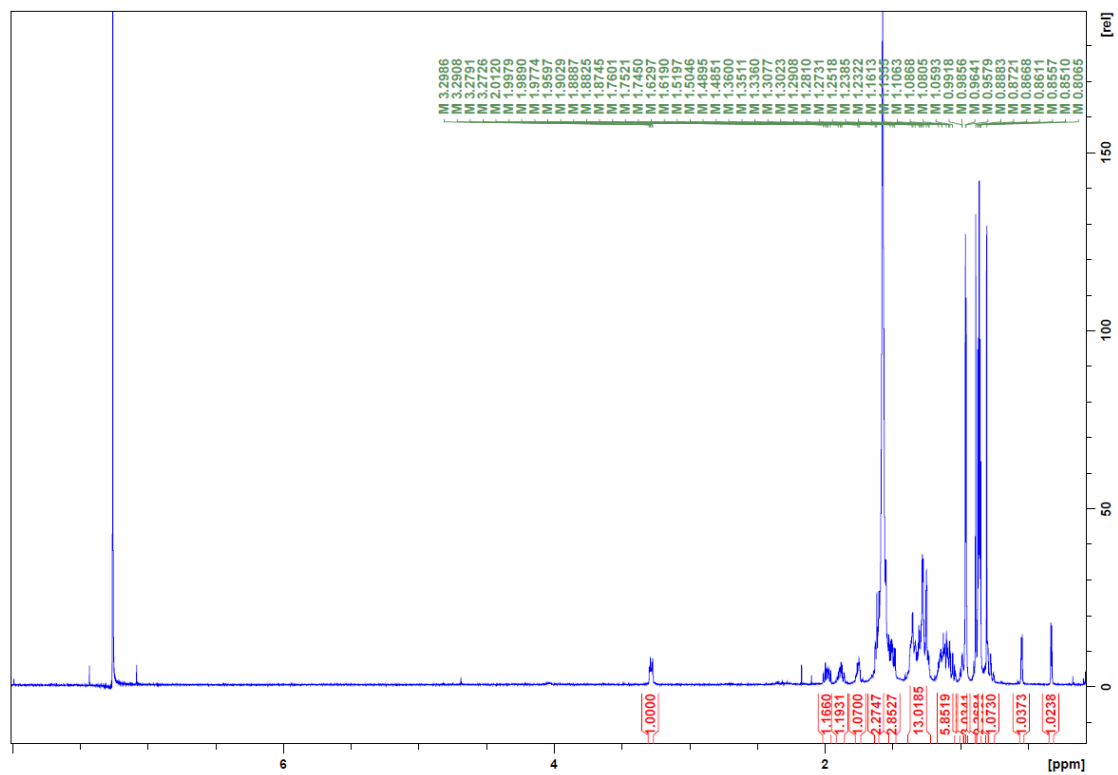

**Figure S14.**  $^1\text{H}$  NMR spectrum of **10** in  $\text{CDCl}_3$ .

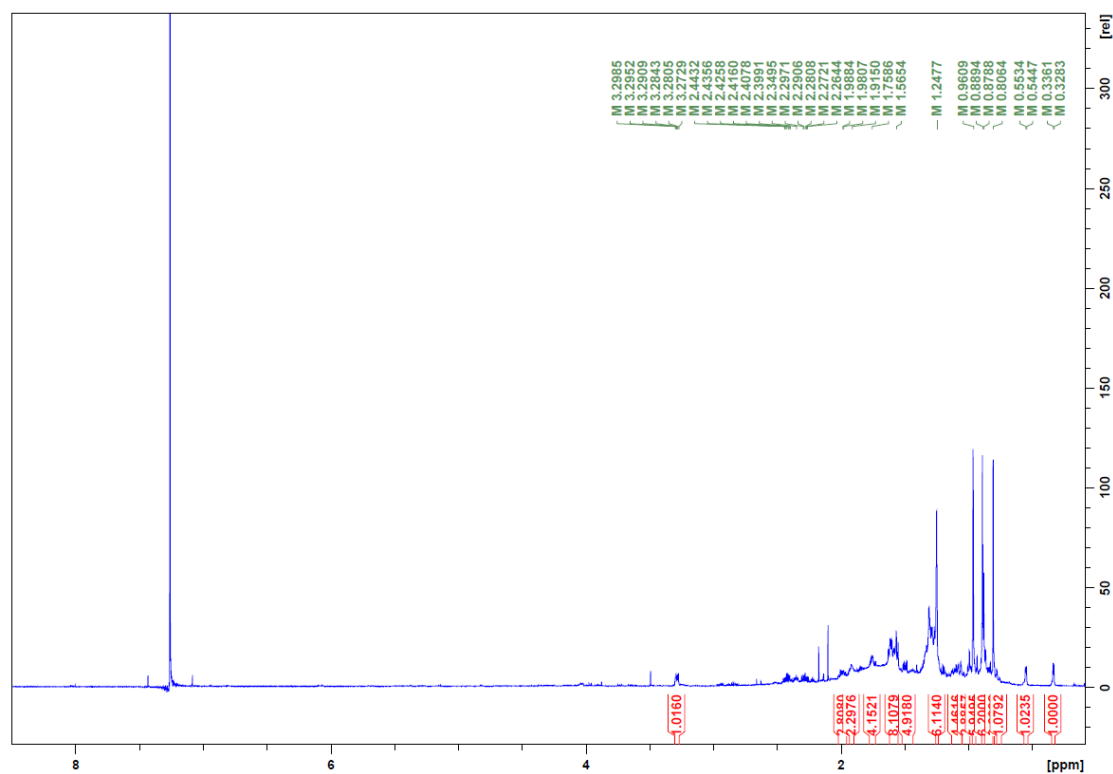

**Figure S15.**  $^1\text{H}$  NMR spectrum of a mixture of **11** and **12** in  $\text{CDCl}_3$ .

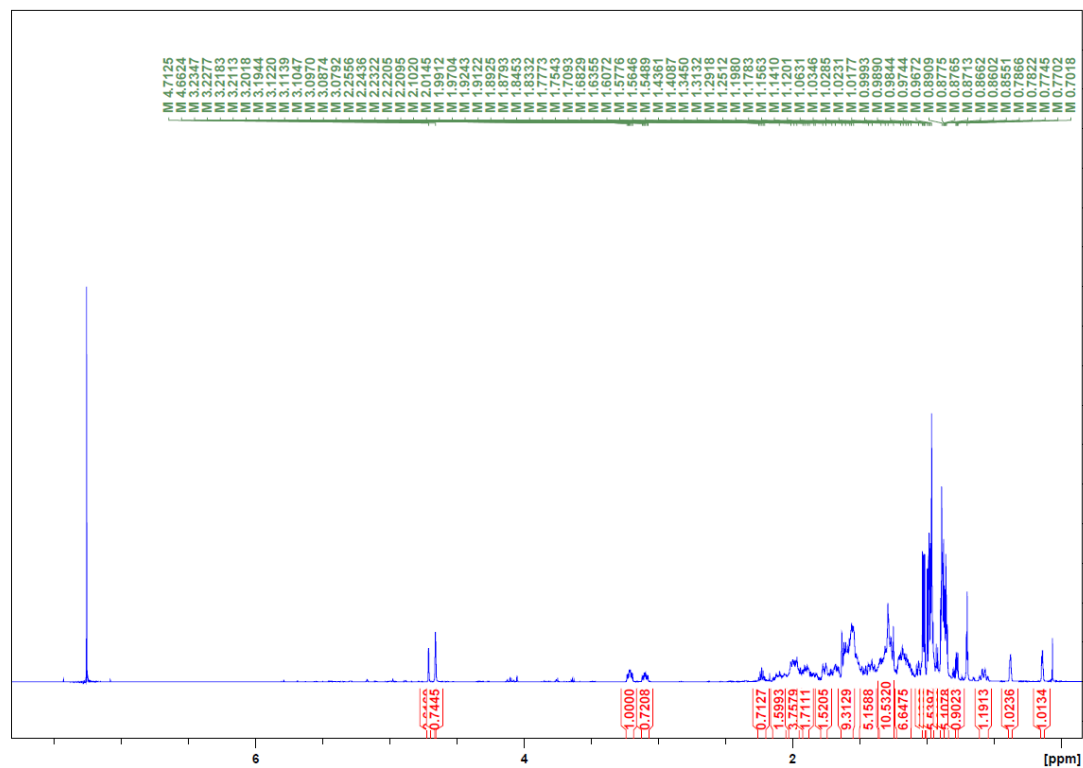

**Figure S16.**  $^1\text{H}$  NMR spectrum of a mixture of **13** and **14** (1:0.8) in  $\text{CDCl}_3$ .

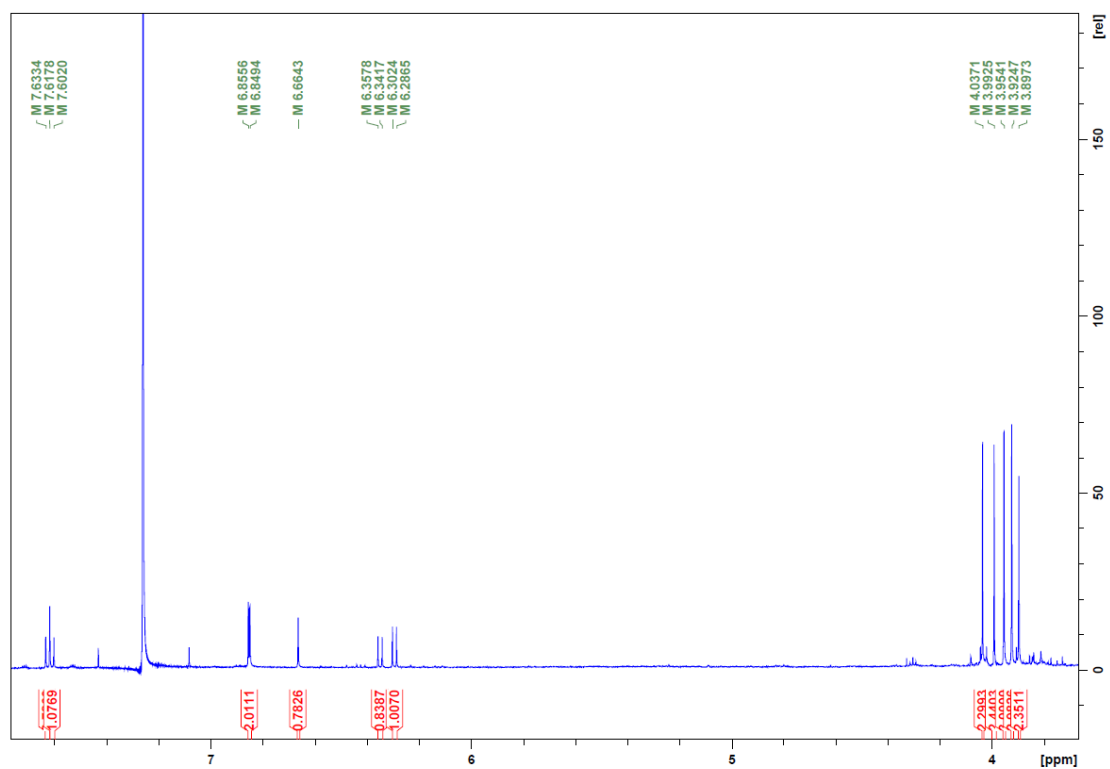

**Figure S17.**  $^1\text{H}$  NMR spectrum of **15** in  $\text{CDCl}_3:\text{CD}_3\text{OD}$  (1:1).

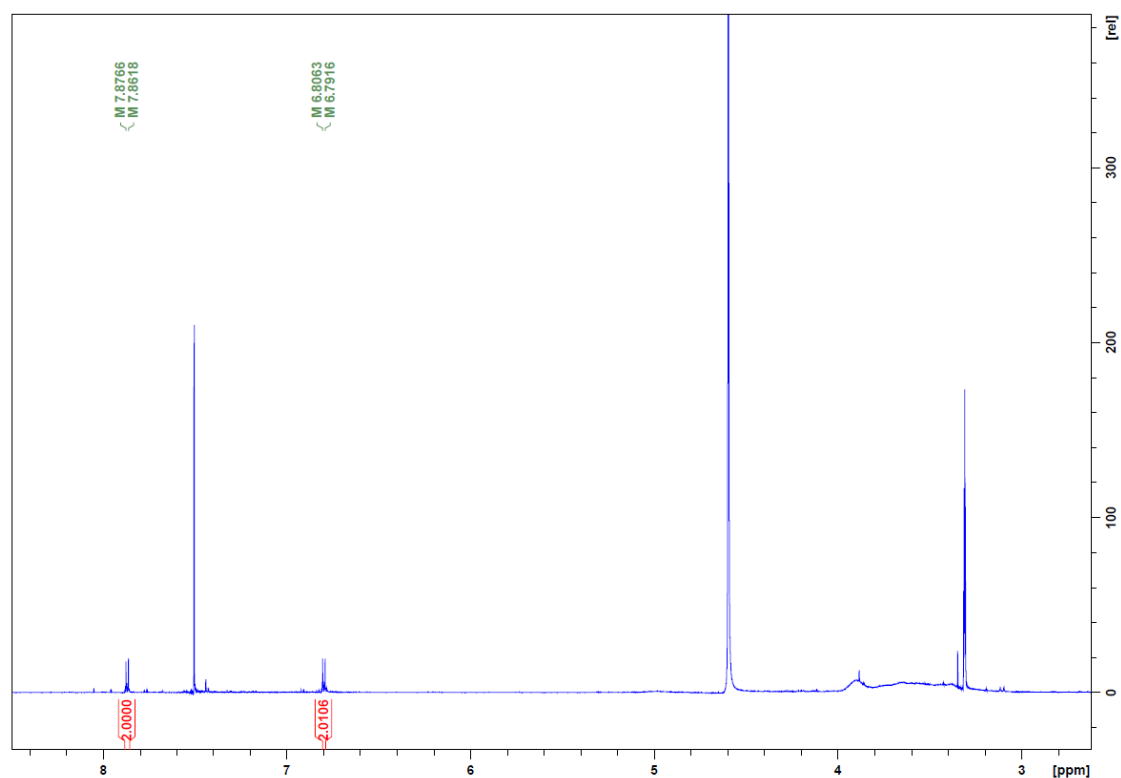

Supplement: s1 [file s1]
